# Supplementary material
Source: PubMed Central journal article supplement (PMC7677182)
Supplement: NIHMS1630465-supplement-1.pdf [file NIHMS1630465-supplement-1.pdf]

## Supplementary Tables

**Table S4. Differentially expressed genes between E8<sub>1</sub><sup>WT(Trac)</sup> and E8<sub>1</sub><sup>Δ(Trac)</sup> CD4<sup>+</sup>CD8αα<sup>+</sup> IELs. Related to Figure 5.**

| Overexpressed in E8 <sub>1</sub> <sup>WT(Trac)</sup> |           |           | Overexpressed in E8 <sub>1</sub> <sup>Δ(Trac)</sup> |           |           |
|------------------------------------------------------|-----------|-----------|-----------------------------------------------------|-----------|-----------|
| gene                                                 | ave_logFC | p_val_adj | gene                                                | ave_logFC | p_val_adj |
| <i>Cd83</i>                                          | 8.577585  | 2.93E-10  | <i>Gm21762</i>                                      | -10.5303  | 1.67E-20  |
| <i>Klrb1a</i>                                        | 6.074966  | 8.77E-10  | <i>Klkl1</i>                                        | -9.84137  | 1.74E-13  |
| <i>Klrb1c</i>                                        | 8.030817  | 3.8E-09   | <i>Btla</i>                                         | -7.32358  | 5.65E-08  |
| <i>Klre1</i>                                         | 4.849967  | 4.02E-09  | <i>Bcl11a</i>                                       | -6.9866   | 3.84E-06  |
| <i>Spry2</i>                                         | 5.75853   | 4.02E-09  | <i>Cox6a2</i>                                       | -9.01962  | 5.51E-06  |
| <i>Lag3</i>                                          | 2.264442  | 7.29E-09  | <i>Fcrla</i>                                        | -7.98591  | 8.32E-06  |
| <i>Gm19590</i>                                       | 7.492748  | 2.45E-06  | <i>Gm17021</i>                                      | -7.08457  | 3.41E-05  |
| <i>Gm16299</i>                                       | 7.230879  | 3.84E-06  | <i>Cct6a</i>                                        | -1.04941  | 3.97E-05  |
| <i>Bcl2a1b</i>                                       | 1.348215  | 4.8E-06   | <i>Dnase1l3</i>                                     | -5.57644  | 0.000122  |
| <i>Zdhhc15</i>                                       | 3.332176  | 5.51E-05  | <i>Alkbh3os1</i>                                    | -6.74636  | 0.000178  |
| <i>Ky</i>                                            | 4.523866  | 1.38E-05  | <i>Zfp607b</i>                                      | -3.9259   | 0.000315  |
| <i>Gm4956</i>                                        | 4.323781  | 2.86E-05  | <i>Gm43375</i>                                      | -6.5652   | 0.00034   |
| <i>Cnrip1</i>                                        | 6.095595  | 5.15E-05  | <i>Gm38214</i>                                      | -6.29071  | 0.000786  |
| <i>Gins1</i>                                         | 5.599377  | 8.68E-05  | <i>Gm43196</i>                                      | -3.80262  | 0.001025  |
| <i>Kazald1</i>                                       | 6.476025  | 9.52E-05  | <i>Olf99</i>                                        | -5.29606  | 0.001253  |
| <i>Cd200r1</i>                                       | 1.51688   | 0.000134  | <i>Sell</i>                                         | -6.53934  | 0.001317  |
| <i>Spin2c</i>                                        | 6.760562  | 0.000135  | <i>Gm49179</i>                                      | -7.03964  | 0.001445  |
| <i>Gm1821</i>                                        | 1.658691  | 0.000147  | <i>Dntt</i>                                         | -8.32337  | 0.001759  |
| <i>Zfp932</i>                                        | 2.325318  | 0.000204  | <i>Olf9528-ps1</i>                                  | -5.79965  | 0.001884  |
| <i>Nrp2</i>                                          | 3.161478  | 0.000387  | <i>Tlr6</i>                                         | -4.83628  | 0.002789  |
| <i>Gm17928</i>                                       | 3.056256  | 0.000687  | <i>Gm37321</i>                                      | -5.22711  | 0.002818  |
| <i>Cyp2j9</i>                                        | 6.412093  | 0.000786  | <i>Lyst</i>                                         | -2.68811  | 0.003276  |
| <i>Bcl2a1d</i>                                       | 1.583238  | 0.001253  | <i>Gm50221</i>                                      | -5.98038  | 0.003785  |
| <i>Tspan4</i>                                        | 5.606894  | 0.001253  | <i>Fbxl13</i>                                       | -6.66278  | 0.003851  |
| <i>Gm15996</i>                                       | 3.612176  | 0.001445  | <i>Gm26575</i>                                      | -5.36307  | 0.004354  |
| <i>Gm42611</i>                                       | 2.160161  | 0.001884  | <i>1500002F19Rik</i>                                | -5.90029  | 0.004702  |
| <i>Hist1h2ap</i>                                     | 2.174963  | 0.002789  | <i>Trav9-2</i>                                      | -2.84198  | 0.005862  |
| <i>Tnfrsf9</i>                                       | 4.01641   | 0.002789  | <i>Siglech</i>                                      | -5.70372  | 0.006438  |
| <i>A930001A20Rik</i>                                 | 6.932589  | 0.003114  | <i>Flt3</i>                                         | -3.48482  | 0.007187  |
| <i>Tmem30a</i>                                       | 1.048406  | 0.00345   | <i>Gm33882</i>                                      | -5.21009  | 0.007605  |
| <i>Rorc</i>                                          | 5.216056  | 0.00345   | <i>Gm44958</i>                                      | -6.21954  | 0.008696  |
| <i>Pla2g4b</i>                                       | 5.985127  | 0.00345   | <i>Wdr13</i>                                        | -2.58232  | 0.009802  |
| <i>Golph3</i>                                        | 1.529466  | 0.003785  | <i>Mynn</i>                                         | -1.66741  | 0.01207   |
| <i>Gm14435</i>                                       | 3.132717  | 0.003795  | <i>Cfap97</i>                                       | -1.59325  | 0.013068  |
| <i>Zfp160</i>                                        | 2.240651  | 0.003997  | <i>Gm37357</i>                                      | -1.68319  | 0.013597  |
| <i>Egr3</i>                                          | 5.691184  | 0.004354  | <i>Ppfi4</i>                                        | -7.76848  | 0.016735  |
| <i>Zdhhc3</i>                                        | 1.780378  | 0.004517  | <i>Mtff1</i>                                        | -4.89168  | 0.017021  |
| <i>Gm11802</i>                                       | 5.439506  | 0.004591  | <i>Fam220a</i>                                      | -1.48648  | 0.017486  |
| <i>Trav7d-5</i>                                      | 6.150892  | 0.004702  | <i>Gm48939</i>                                      | -4.25497  | 0.021422  |
| <i>Trav7n-5</i>                                      | 6.150892  | 0.004702  | <i>Gm45495</i>                                      | -3.3197   | 0.023629  |
| <i>Nfkib</i>                                         | 1.538276  | 0.005151  | <i>Plaur</i>                                        | -4.72063  | 0.032266  |
| <i>Stmn1</i>                                         | 2.374753  | 0.006036  | <i>Gm28373</i>                                      | -4.53106  | 0.034206  |
| <i>Setmar</i>                                        | 4.208802  | 0.006036  | <i>Cd300c</i>                                       | -7.77426  | 0.034914  |
| <i>Tsga10</i>                                        | 4.828529  | 0.006226  | <i>Plag1</i>                                        | -5.82179  | 0.034914  |
| <i>Il3ra</i>                                         | 4.934256  | 0.006226  | <i>Appbp2</i>                                       | -1.16342  | 0.034914  |
| <i>Fam174b</i>                                       | 5.608441  | 0.006704  | <i>9030407P20Rik</i>                                | -3.58214  | 0.03579   |
| <i>Cks2</i>                                          | 1.710192  | 0.00711   | <i>Plce1</i>                                        | -2.54427  | 0.036514  |
| <i>Plek</i>                                          | 3.135804  | 0.008186  | <i>Gm16060</i>                                      | -3.98283  | 0.037372  |
| <i>Gm47015</i>                                       | 1.492324  | 0.008696  | <i>Adcy3</i>                                        | -2.10636  | 0.039316  |
| <i>Enkd1</i>                                         | 3.061886  | 0.008868  | <i>Lrp8</i>                                         | -3.96959  | 0.039567  |
| <i>Gm16572</i>                                       | 5.696436  | 0.009159  | <i>Rlf</i>                                          | -1.53071  | 0.040456  |
| <i>Creb3l1</i>                                       | 5.436078  | 0.00985   | <i>Rbm33</i>                                        | -1.44965  | 0.040456  |
| <i>Osgin1</i>                                        | 1.476867  | 0.010278  | <i>Ltb4r1</i>                                       | -4.5426   | 0.043707  |
| <i>Cenpf</i>                                         | 3.138301  | 0.010639  | <i>Trav13-1</i>                                     | -2.70602  | 0.045393  |
| <i>Zfp458</i>                                        | 2.6881    | 0.010772  | <i>Trav10</i>                                       | -2.52101  | 0.045947  |
| <i>Pnpo</i>                                          | 1.792949  | 0.012193  |                                                     |           |           |
| <i>Clec16a</i>                                       | 2.552224  | 0.012193  |                                                     |           |           |
| <i>Ska1</i>                                          | 5.192346  | 0.012193  |                                                     |           |           |
| <i>Bcap29</i>                                        | 1.224712  | 0.01458   |                                                     |           |           |
| <i>Rpl36-ps2</i>                                     | 4.058048  | 0.01458   |                                                     |           |           |

|                      |          |          |
|----------------------|----------|----------|
| <i>Gem</i>           | 5.760524 | 0.014852 |
| <i>Gm11423</i>       | 2.545579 | 0.015383 |
| <i>Vps54</i>         | 1.181797 | 0.017021 |
| <i>Itih5</i>         | 3.820922 | 0.017109 |
| <i>Mkl1</i>          | 4.21895  | 0.017486 |
| <i>Rictor</i>        | 1.43574  | 0.018067 |
| <i>6330403K07Rik</i> | 3.216177 | 0.0202   |
| <i>Rida</i>          | 1.775842 | 0.021422 |
| <i>Aoah</i>          | 4.281722 | 0.021745 |
| <i>Mbnl3</i>         | 1.335676 | 0.022484 |
| <i>Ephx1</i>         | 2.189419 | 0.024468 |
| <i>Txn14b</i>        | 1.785039 | 0.027541 |
| <i>Gm25363</i>       | 4.259935 | 0.029876 |
| <i>Ttc30a1</i>       | 6.915919 | 0.03179  |
| <i>Glp1r</i>         | 1.449691 | 0.032266 |
| <i>Ciart</i>         | 4.260166 | 0.032266 |
| <i>As3mt</i>         | 2.00779  | 0.032315 |
| <i>Gm36262</i>       | 4.862997 | 0.032958 |
| <i>Igflr1</i>        | 1.165425 | 0.033625 |
| <i>Gm47830</i>       | 4.834154 | 0.034206 |
| <i>Gm26510</i>       | 1.513678 | 0.036514 |
| <i>Nat14</i>         | 4.424568 | 0.037372 |
| <i>Zfp212</i>        | 1.779624 | 0.038153 |
| <i>Nup133</i>        | 2.660052 | 0.039147 |
| <i>Ucp2</i>          | 1.135401 | 0.040002 |
| <i>Kat6a</i>         | 1.507153 | 0.041213 |
| <i>Gm48735</i>       | 1.834047 | 0.041332 |
| <i>Penk</i>          | 3.417682 | 0.041658 |
| <i>Retreg3</i>       | 1.891107 | 0.042317 |
| <i>Pgm1</i>          | 1.312999 | 0.043707 |
| <i>Tacc2</i>         | 1.768766 | 0.043707 |
| <i>Cog7</i>          | 1.98717  | 0.044089 |
| <i>Ylpm1</i>         | 1.194531 | 0.044847 |
| <i>Lrrc20</i>        | 1.862899 | 0.044847 |
| <i>Gm45110</i>       | 2.411711 | 0.045947 |
| <i>Egr1</i>          | 5.215026 | 0.04765  |

List of significantly expressed genes relatively overexpressed in  $E8_I^{WT(Trac)} CD4^+CD8\alpha\alpha^+$  intraepithelial lymphocytes ( $CD4^+CD8\alpha\alpha^+$ IELs; left) or in  $E8_I^{\Delta(Trac)} CD4^+CD8\alpha\alpha^+$  IELs (right) as assessed by the wald-test. Average log fold change of expression (ave\_logFC) and adjusted p value (p\_val\_adj) as indicated. N=3 per genotype,  $p_{sig}<0.05$ . See also Figure 5.

**Table S5. Differentially expressed genes between E8<sup>WT(Trac)</sup> and E8<sup>Δ(Trac)</sup> CD8αβ<sup>+</sup>CD8αα<sup>+</sup> IELs. Related to Figure 5.**

| Overexpressed in E8 <sup>WT(Trac)</sup> |           |           | Overexpressed in E8 <sup>Δ(Trac)</sup> |           |           |
|-----------------------------------------|-----------|-----------|----------------------------------------|-----------|-----------|
| gene                                    | ave logFC | p_val adj | gene                                   | ave logFC | p_val adj |
| <i>Il2rb</i>                            | 1.838553  | 6.58E-18  | <i>Plac8</i>                           | -1.89668  | 1.78E-26  |
| <i>Calcb</i>                            | 8.540629  | 3.06E-15  | <i>Iglc3</i>                           | -8.77103  | 5.07E-17  |
| <i>Twist2</i>                           | 7.857668  | 7.89E-11  | <i>Ly6d</i>                            | -9.98308  | 1.9E-14   |
| <i>Trim16</i>                           | 7.818193  | 1.3E-10   | <i>Rnase6</i>                          | -7.78589  | 1.99E-13  |
| <i>Tigit</i>                            | 1.669783  | 2.94E-09  | <i>Btnl7-ps</i>                        | -8.08394  | 3.67E-12  |
| <i>Tsga10</i>                           | 2.336488  | 9.2E-09   | <i>Cd74</i>                            | -3.47087  | 5.08E-12  |
| <i>Gjb2</i>                             | 6.788909  | 2E-08     | <i>Sdc4</i>                            | -4.4874   | 1.3E-11   |
| <i>Rgs16</i>                            | 7.370943  | 3.09E-08  | <i>Ppp1r14d</i>                        | -8.84606  | 7.01E-10  |
| <i>Itih5</i>                            | 2.927409  | 4.68E-08  | <i>Mgst1</i>                           | -8.59324  | 1.35E-09  |
| <i>Grk3</i>                             | 2.914981  | 2.08E-07  | <i>Tcf7l2</i>                          | -5.52242  | 2.29E-09  |
| <i>Mtus2</i>                            | 6.363309  | 4.5E-07   | <i>Dlg3</i>                            | -3.61153  | 1.75E-08  |
| <i>Sh2d2a</i>                           | 1.038083  | 4.79E-07  | <i>Eya2</i>                            | -3.81918  | 4.91E-07  |
| <i>Rpl36-ps2</i>                        | 5.473854  | 1.93E-06  | <i>Heatr5a</i>                         | -1.45863  | 2.77E-06  |
| <i>Spry2</i>                            | 1.78517   | 2.08E-06  | <i>Slc51a</i>                          | -4.2348   | 2.89E-06  |
| <i>Phf1os</i>                           | 6.594028  | 3.61E-06  | <i>Gzmk</i>                            | -1.25234  | 3.41E-06  |
| 1700047G07Rik                           | 2.376492  | 6.52E-06  | <i>Clca4b</i>                          | -9.82448  | 3.61E-06  |
| <i>Nr4a1</i>                            | 5.926869  | 7.91E-06  | <i>Smim22</i>                          | -7.36771  | 5.48E-06  |
| <i>Nusap1</i>                           | 5.378206  | 7.91E-06  | <i>Cds1</i>                            | -6.52016  | 6.2E-06   |
| <i>Gm45716</i>                          | 2.275984  | 1.27E-05  | <i>Cdc42ep4</i>                        | -6.15667  | 6.2E-06   |
| <i>Cdkn3</i>                            | 6.381035  | 1.32E-05  | <i>Gprn3</i>                           | -6.52167  | 2.09E-05  |
| <i>Wnt10a</i>                           | 6.549708  | 1.35E-05  | <i>Thy1</i>                            | -1.40797  | 2.09E-05  |
| <i>Plek</i>                             | 1.972456  | 1.35E-05  | <i>Atp1b1</i>                          | -3.07396  | 2.18E-05  |
| <i>Ephx1</i>                            | 2.602742  | 2.09E-05  | <i>Glipr2</i>                          | -3.34186  | 2.3E-05   |
| <i>Ckap2l</i>                           | 5.762481  | 2.09E-05  | <i>Kcnj8</i>                           | -6.59678  | 2.79E-05  |
| <i>Serp2</i>                            | 4.215937  | 2.63E-05  | <i>Ptprf</i>                           | -6.41495  | 2.9E-05   |
| <i>Dram1</i>                            | 6.451004  | 2.9E-05   | <i>Ifit1bl1</i>                        | -1.94358  | 4.31E-05  |
| <i>Crem</i>                             | 2.716409  | 3.27E-05  | <i>Prss30</i>                          | -6.19576  | 7.83E-05  |
| 2900026A02Rik                           | 1.467805  | 3.27E-05  | <i>Gpa33</i>                           | -6.5909   | 9.16E-05  |
| <i>Birc5</i>                            | 3.068787  | 3.44E-05  | 4930447K03Rik                          | -6.24899  | 9.16E-05  |
| 6720464F23Rik                           | 1.830093  | 4.56E-05  | <i>Gm39091</i>                         | -5.62813  | 0.00011   |
| <i>Klrb1a</i>                           | 4.024957  | 5.03E-05  | <i>Pak6</i>                            | -6.75568  | 0.000113  |
| <i>Nrn1</i>                             | 5.842732  | 5.29E-05  | <i>Rnf186</i>                          | -7.1091   | 0.000119  |
| <i>Ptpn6</i>                            | 1.302889  | 0.000113  | <i>Btbd16</i>                          | -2.15688  | 0.000146  |
| <i>Cdc6</i>                             | 5.69186   | 0.000114  | <i>Trim31</i>                          | -6.1468   | 0.000181  |
| 9530050K03Rik                           | 4.68472   | 0.000119  | <i>Crb3</i>                            | -2.5452   | 0.000243  |
| <i>Ska1</i>                             | 5.539225  | 0.000128  | <i>Dkk1</i>                            | -1.8539   | 0.000244  |
| <i>Cpa2</i>                             | 6.142104  | 0.000151  | <i>Gtf3c4</i>                          | -2.53712  | 0.00033   |
| <i>Tox</i>                              | 1.322971  | 0.000202  | <i>Il7r</i>                            | -2.17182  | 0.000428  |
| <i>Gm43636</i>                          | 3.863844  | 0.000225  | <i>Soat2</i>                           | -1.02958  | 0.000455  |
| <i>Iqsec1</i>                           | 1.396754  | 0.000232  | <i>Lypd8</i>                           | -10.6959  | 0.000476  |
| <i>Gm156</i>                            | 3.508176  | 0.000239  | <i>Klf3</i>                            | -2.15986  | 0.000542  |
| <i>Gm48182</i>                          | 5.344042  | 0.000274  | <i>H2-Ab1</i>                          | -3.23751  | 0.000642  |
| <i>Igflr1</i>                           | 1.194761  | 0.00033   | <i>Phf11b</i>                          | -2.10252  | 0.000652  |
| <i>Gm38190</i>                          | 1.094031  | 0.000365  | <i>Pou4f1</i>                          | -3.14446  | 0.000669  |
| <i>Gm30790</i>                          | 5.7876    | 0.000388  | <i>Gdpd1</i>                           | -5.81388  | 0.000727  |
| <i>Mnd1</i>                             | 5.976298  | 0.000415  | <i>Cdr2</i>                            | -2.52604  | 0.000759  |
| <i>Pdzd2</i>                            | 2.764092  | 0.000423  | <i>Lta</i>                             | -2.9727   | 0.000775  |
| <i>Bcl2l11</i>                          | 1.152136  | 0.000444  | <i>Gm36043</i>                         | -2.6426   | 0.001065  |
| <i>Tnfsf4</i>                           | 5.938302  | 0.00049   | <i>Tm4sf5</i>                          | -3.21862  | 0.001082  |
| <i>Hist1h2ap</i>                        | 1.655867  | 0.000535  | <i>Slc5a1</i>                          | -9.46691  | 0.001115  |
| <i>Nepro</i>                            | 2.364155  | 0.000554  | <i>F2rl2</i>                           | -2.12807  | 0.001198  |
| <i>Zfp935</i>                           | 6.530183  | 0.000572  | <i>Lgr4</i>                            | -4.04175  | 0.00123   |
| <i>Gm44901</i>                          | 1.768357  | 0.000577  | <i>Ptafr</i>                           | -3.26735  | 0.00123   |
| <i>Slc35g2</i>                          | 5.537121  | 0.000642  | <i>Cd24a</i>                           | -5.67781  | 0.001467  |
| <i>S100a1</i>                           | 1.906517  | 0.00071   | <i>Mthfr</i>                           | -5.57881  | 0.001816  |
| <i>Zfp318</i>                           | 2.623999  | 0.000727  | <i>S100g</i>                           | -4.58647  | 0.001886  |
| <i>Rnf19a</i>                           | 2.466756  | 0.000731  | <i>App</i>                             | -2.26836  | 0.001928  |
| <i>Cd101</i>                            | 1.255209  | 0.000804  | <i>Gm2237</i>                          | -2.79401  | 0.001977  |
| 4833445I07Rik                           | 5.727192  | 0.000969  | <i>Nfatc2</i>                          | -1.41669  | 0.00229   |
| <i>Dusp5</i>                            | 1.972161  | 0.001065  | <i>Slc4a10</i>                         | -3.39131  | 0.0036    |
| <i>M1ap</i>                             | 3.148858  | 0.001065  | <i>Mansc4</i>                          | -5.44433  | 0.004484  |
| <i>Unc13a</i>                           | 4.269183  | 0.00123   | <i>Src</i>                             | -5.01571  | 0.00449   |
| <i>Bcl2a1b</i>                          | 1.37234   | 0.001232  | <i>Ski</i>                             | -1.5631   | 0.004634  |
| <i>Gm12036</i>                          | 2.784046  | 0.001346  | <i>Tmem86a</i>                         | -4.87196  | 0.005005  |

|               |          |          |               |          |          |
|---------------|----------|----------|---------------|----------|----------|
| Gm20689       | 6.455044 | 0.00143  | Taf4          | -2.27375 | 0.006452 |
| Cnih3         | 5.229141 | 0.00163  | Cish          | -1.14121 | 0.006919 |
| Lag3          | 2.059385 | 0.00173  | Trpv2         | -1.31028 | 0.007024 |
| Cib2          | 3.854989 | 0.001848 | Myo7b         | -5.99949 | 0.007253 |
| Trav9d-3      | 2.29694  | 0.001856 | Mirt1         | -1.73149 | 0.007375 |
| Trav9n-3      | 2.29694  | 0.001856 | Tnfaip1       | -2.0164  | 0.007449 |
| Cep85l        | 2.013048 | 0.001856 | Cox6a2        | -5.60526 | 0.007597 |
| Gm14377       | 2.262636 | 0.001856 | Arhgef11      | -6.1055  | 0.007849 |
| Ceacam-ps1    | 5.748506 | 0.001886 | Rbm47         | -2.11455 | 0.007981 |
| Kif11         | 2.632826 | 0.001886 | Tmem97        | -1.09369 | 0.00858  |
| Tnfrsf9       | 3.015079 | 0.001886 | Rogdi         | -2.46868 | 0.008938 |
| Endod1        | 2.086059 | 0.001886 | Ces2e         | -8.64236 | 0.009581 |
| Gm17928       | 2.721317 | 0.001886 | Kdelr1        | -1.6114  | 0.010074 |
| Gm44860       | 4.017727 | 0.001966 | Ap1m2         | -3.36303 | 0.011595 |
| Pabpc4        | 1.348914 | 0.00198  | 5430431A17Rik | -1.14449 | 0.012706 |
| Zfp361l       | 1.330951 | 0.002061 | Lactb2        | -1.4014  | 0.014797 |
| Ypel2         | 2.061505 | 0.002138 | Trav13d-3     | -5.12508 | 0.014838 |
| Dars2         | 2.221242 | 0.002253 | Cmb1          | -6.38465 | 0.015846 |
| Gmpr          | 4.610124 | 0.002282 | Cdkn2b        | -4.55511 | 0.016762 |
| C1qbp         | 1.010959 | 0.002475 | Mttp          | -3.84505 | 0.016762 |
| Nrcam         | 4.278282 | 0.0036   | Aoc1          | -7.88392 | 0.017424 |
| Gm19590       | 2.897056 | 0.003952 | Tagln2        | -1.48519 | 0.01779  |
| Trav4d-4      | 6.622715 | 0.004201 | Cxcr3         | -1.52725 | 0.018036 |
| Trav4n-4      | 6.622715 | 0.004201 | Pde11a        | -2.13368 | 0.018923 |
| Bcl2l15       | 2.359205 | 0.00449  |               |          |          |
| Gm15287       | 3.360704 | 0.004735 |               |          |          |
| Il6st         | 1.170593 | 0.004781 |               |          |          |
| Stat4         | 1.089641 | 0.004801 |               |          |          |
| Sulf2         | 2.2495   | 0.004921 |               |          |          |
| Gm44752       | 3.64351  | 0.005005 |               |          |          |
| Ccdc102a      | 1.601084 | 0.00514  |               |          |          |
| Gm16638       | 2.277832 | 0.005644 |               |          |          |
| Galnt4        | 2.330559 | 0.005662 |               |          |          |
| Helz          | 1.22547  | 0.005887 |               |          |          |
| Tctex1d1      | 4.153338 | 0.005903 |               |          |          |
| Gm816         | 4.302373 | 0.005903 |               |          |          |
| A530041M06Rik | 1.451263 | 0.005993 |               |          |          |
| Senp8         | 5.329353 | 0.006425 |               |          |          |
| Gm16575       | 4.086798 | 0.006452 |               |          |          |
| Ighv6-4       | 5.320397 | 0.007003 |               |          |          |
| Fam83d        | 5.76987  | 0.007041 |               |          |          |
| Cd200r2       | 2.3063   | 0.007041 |               |          |          |
| Gm48904       | 2.976209 | 0.007674 |               |          |          |
| BB557941      | 5.118324 | 0.007736 |               |          |          |
| Wnk3          | 4.884693 | 0.007752 |               |          |          |
| Cd200r1       | 1.846769 | 0.00815  |               |          |          |
| Trbj1-1       | 2.12548  | 0.00858  |               |          |          |
| Got2-ps1      | 5.089218 | 0.008827 |               |          |          |
| Trav16d-dv11  | 5.299982 | 0.008938 |               |          |          |
| Gm14021       | 5.048681 | 0.009171 |               |          |          |
| Xlr3b         | 4.612688 | 0.009539 |               |          |          |
| Pthrhd1       | 1.903929 | 0.009642 |               |          |          |
| Ehmt1         | 1.514238 | 0.010158 |               |          |          |
| Gm45406       | 4.974128 | 0.012009 |               |          |          |
| Ltf           | 4.987067 | 0.0123   |               |          |          |
| Tnfsf8        | 2.271699 | 0.013892 |               |          |          |
| Arap3         | 1.686096 | 0.014451 |               |          |          |
| Bcl2a1d       | 1.772999 | 0.01465  |               |          |          |
| Lilr4b        | 1.425025 | 0.014869 |               |          |          |
| E230029C05Rik | 2.421245 | 0.015039 |               |          |          |
| Gm16741       | 3.995124 | 0.016117 |               |          |          |
| Glp1r         | 1.029124 | 0.016762 |               |          |          |
| Capn3         | 1.017118 | 0.018631 |               |          |          |
| Cela1         | 2.111948 | 0.018868 |               |          |          |
| Pecam1        | 1.200806 | 0.018949 |               |          |          |
| Birc2         | 1.054818 | 0.018978 |               |          |          |
| Egr2          | 4.890629 | 0.019792 |               |          |          |
| C330011M18Rik | 3.062187 | 0.0205   |               |          |          |
| Abhd14a       | 3.228564 | 0.021022 |               |          |          |
| Trav14n-3     | 4.776638 | 0.021022 |               |          |          |

|                      |          |          |
|----------------------|----------|----------|
| <i>Ggct</i>          | 1.201207 | 0.021022 |
| <i>Egr1</i>          | 2.031614 | 0.021416 |
| <i>Mcoln2</i>        | 2.041385 | 0.022436 |
| <i>9130019O22Rik</i> | 2.691536 | 0.022549 |
| <i>Gm17173</i>       | 5.158085 | 0.022879 |
| <i>Klrd1</i>         | 1.319259 | 0.023979 |
| <i>Rnf144a</i>       | 3.170648 | 0.023994 |
| <i>Slc2a9</i>        | 1.637185 | 0.023994 |
| <i>Sik1</i>          | 2.309241 | 0.025315 |
| <i>Casp3</i>         | 1.116233 | 0.02536  |
| <i>Zfp7</i>          | 1.486469 | 0.025889 |
| <i>Gm11775</i>       | 2.615296 | 0.026245 |
| <i>Gm49004</i>       | 1.893869 | 0.026245 |
| <i>Fes</i>           | 1.35603  | 0.026759 |
| <i>Gas2l3</i>        | 2.790885 | 0.027359 |
| <i>Gm16675</i>       | 3.018773 | 0.027845 |
| <i>Ubttd2</i>        | 3.271827 | 0.028088 |
| <i>Zfp948</i>        | 3.78703  | 0.028876 |
| <i>Cyth3</i>         | 1.06176  | 0.030383 |
| <i>Ntf5</i>          | 3.50029  | 0.030383 |
| <i>Sft2d2</i>        | 1.095261 | 0.030458 |
| <i>Lig4</i>          | 2.710782 | 0.030458 |
| <i>Cenpa</i>         | 2.588078 | 0.030459 |
| <i>Gm44641</i>       | 3.09145  | 0.030722 |
| <i>AW549877</i>      | 1.320012 | 0.031428 |
| <i>Acox1</i>         | 1.092486 | 0.031582 |
| <i>Gm43042</i>       | 1.125295 | 0.032614 |
| <i>Gm17056</i>       | 4.447523 | 0.033808 |
| <i>Pdp1</i>          | 1.637505 | 0.036477 |
| <i>4930505O20Rik</i> | 4.560369 | 0.036717 |
| <i>Rasgef1c</i>      | 2.089432 | 0.036717 |
| <i>Rps26-ps1</i>     | 1.741871 | 0.036976 |
| <i>Tyrobp</i>        | 1.087746 | 0.037073 |
| <i>Fam174b</i>       | 1.677018 | 0.037073 |
| <i>Gm11767</i>       | 1.972068 | 0.037971 |
| <i>Cblb</i>          | 1.202986 | 0.038716 |
| <i>Spo11</i>         | 2.715193 | 0.040457 |
| <i>2700062C07Rik</i> | 1.304598 | 0.040457 |
| <i>Gm47571</i>       | 2.421928 | 0.040457 |
| <i>Itgav</i>         | 1.232708 | 0.040559 |
| <i>Gm48430</i>       | 1.95179  | 0.041389 |
| <i>Trbv31</i>        | 4.709295 | 0.041487 |
| <i>Matk</i>          | 1.887288 | 0.042519 |
| <i>Ccdc112</i>       | 2.424079 | 0.0427   |
| <i>Gm49359</i>       | 1.577839 | 0.043574 |
| <i>Nr4a2</i>         | 2.071877 | 0.043789 |
| <i>Ckm</i>           | 2.559892 | 0.044383 |
| <i>Rasgef1a</i>      | 1.9702   | 0.04661  |
| <i>Rtn4rl1</i>       | 1.482473 | 0.046831 |
| <i>Cd200</i>         | 1.696852 | 0.049049 |
| <i>Xaf1</i>          | 1.549737 | 0.049049 |
| <i>Rbm11</i>         | 1.773925 | 0.049794 |

List of significantly expressed genes relatively overexpressed in  $E8_i^{WT(Trac)} CD8\beta^+CD8\alpha\alpha^+$  intraepithelial lymphocytes ( $CD8\alpha\beta^+CD8\alpha\alpha^+$ ; left) or in  $E8_i^{\Delta(Trac)} CD8\alpha\beta^+CD8\alpha\alpha^+$  (right) as assessed by the wald-test. Average log fold change of expression (ave\_logFC) and adjusted p value (p\_val\_adj) as indicated. N=3 per genotype,  $p_{sig}<0.05$ . See also Figure 5.

**Table S6. Differentially expressed genes between E8<sub>l</sub><sup>WT(Trac)</sup> and E8<sub>l</sub><sup>Δ(Trac)</sup> nIELs. Related to Figure 5.**

| Overexpressed in E8 <sub>l</sub> <sup>WT(Trac)</sup> |           |           | Overexpressed in E8 <sub>l</sub> <sup>Δ(Trac)</sup> |           |             |
|------------------------------------------------------|-----------|-----------|-----------------------------------------------------|-----------|-------------|
| gene                                                 | ave logFC | p_val adj | gene                                                | ave logFC | p_val adj   |
| <i>Trac</i>                                          | 1.651493  | 2.71E-26  | <i>Trdc</i>                                         | -4.53865  | 1.26254E-46 |
| <i>Spry2</i>                                         | 2.094503  | 1.23E-21  | <i>Cish</i>                                         | -1.27063  | 7.03338E-10 |
| <i>Fcrl1</i>                                         | 8.550116  | 2.84E-16  | <i>A130014A01Rik</i>                                | -4.93386  | 1.30022E-09 |
| <i>Gm1821</i>                                        | 1.164367  | 6.83E-11  | <i>Bbs10</i>                                        | -7.48837  | 2.01595E-09 |
| <i>Tigit</i>                                         | 1.679362  | 7.03E-10  | <i>Plac8</i>                                        | -1.16391  | 3.38171E-08 |
| <i>Cd200r2</i>                                       | 1.165216  | 4.22E-09  | <i>Thy1</i>                                         | -2.31287  | 4.3433E-08  |
| <i>Klhdc9</i>                                        | 7.42437   | 4.22E-09  | <i>Syk</i>                                          | -6.91316  | 1.66875E-07 |
| <i>Rpl36-ps2</i>                                     | 6.328376  | 4.21E-08  | <i>Lat</i>                                          | -1.18016  | 1.93934E-07 |
| <i>Cela1</i>                                         | 1.21494   | 4.54E-08  | <i>Krt18</i>                                        | -8.56492  | 3.91255E-07 |
| <i>Smim10l2a</i>                                     | 4.245129  | 5.05E-08  | <i>Scin</i>                                         | -1.94765  | 9.48968E-07 |
| <i>Klr1a</i>                                         | 1.827496  | 1.67E-07  | <i>Gm47322</i>                                      | -6.45336  | 2.60109E-06 |
| <i>Gm28112</i>                                       | 1.008876  | 1.93E-07  | <i>Kbtbd13</i>                                      | -6.45716  | 2.99673E-06 |
| <i>Bcl2a1d</i>                                       | 1.643027  | 1.96E-07  | <i>5031439G07Rik</i>                                | -4.1797   | 3.08547E-06 |
| <i>Ikzf2</i>                                         | 1.072478  | 2.2E-07   | <i>Cd63</i>                                         | -3.00503  | 3.08547E-06 |
| <i>Nr4a2</i>                                         | 2.143791  | 2.72E-07  | <i>Gm42872</i>                                      | -5.24863  | 5.84823E-06 |
| <i>Cntln</i>                                         | 2.19592   | 3.91E-07  | <i>Gm39091</i>                                      | -6.42539  | 1.77748E-05 |
| <i>Cnih3</i>                                         | 4.192692  | 3.91E-07  | <i>Thns12</i>                                       | -4.97354  | 3.23055E-05 |
| <i>Sh2d2a</i>                                        | 1.183584  | 8.47E-07  | <i>B9d1</i>                                         | -6.32686  | 3.26977E-05 |
| <i>Arhgap11a</i>                                     | 4.707478  | 1.62E-06  | <i>Cdc14b</i>                                       | -3.06993  | 3.67793E-05 |
| <i>Apol10a</i>                                       | 6.531363  | 1.88E-06  | <i>Gzmk</i>                                         | -1.00806  | 8.87897E-05 |
| <i>Gm156</i>                                         | 2.721936  | 2.24E-06  | <i>Susd2</i>                                        | -5.59168  | 0.000233757 |
| <i>Bcl2a1b</i>                                       | 1.163319  | 2.37E-06  | <i>Gm26353</i>                                      | -6.01318  | 0.000274643 |
| <i>Bcl2l15</i>                                       | 1.619873  | 3E-06     | <i>Pdzk1</i>                                        | -7.3396   | 0.000320842 |
| <i>Gjb2</i>                                          | 4.760034  | 3.73E-06  | <i>Rnf146</i>                                       | -1.10054  | 0.000595956 |
| <i>Gm17928</i>                                       | 1.431437  | 3.73E-06  | <i>Tpcn1</i>                                        | -2.57531  | 0.000658268 |
| <i>Sft2d2</i>                                        | 1.474215  | 4.37E-06  | <i>Gm30934</i>                                      | -5.83734  | 0.000711777 |
| <i>Pik3ap1</i>                                       | 1.316334  | 5.85E-06  | <i>Ifi208</i>                                       | -1.46736  | 0.000723897 |
| <i>Tex2</i>                                          | 1.209198  | 5.98E-06  | <i>Zscan30</i>                                      | -5.80015  | 0.000810335 |
| <i>Trav6-1</i>                                       | 8.050649  | 1.4E-05   | <i>Atp8a2</i>                                       | -1.8044   | 0.001098701 |
| <i>Klhdc2</i>                                        | 1.038815  | 1.76E-05  | <i>Osm</i>                                          | -6.16468  | 0.001165619 |
| <i>Ccrl2</i>                                         | 1.647218  | 1.98E-05  | <i>Gm45378</i>                                      | -5.7467   | 0.001165619 |
| <i>Hal</i>                                           | 3.449997  | 3.68E-05  | <i>Fnbp1l</i>                                       | -3.07833  | 0.001165619 |
| <i>Il2rb</i>                                         | 1.278441  | 7.47E-05  | <i>Gm45867</i>                                      | -2.1641   | 0.001168729 |
| <i>Gm43042</i>                                       | 1.033033  | 8.97E-05  | <i>Galnt10</i>                                      | -2.4545   | 0.001353819 |
| <i>Map4k5</i>                                        | 2.318255  | 9.73E-05  | <i>Cd6</i>                                          | -3.89704  | 0.001390277 |
| <i>Ptpn6</i>                                         | 1.312568  | 0.000137  | <i>E430021H15Rik</i>                                | -1.39668  | 0.001390277 |
| <i>Pdgfb</i>                                         | 5.47043   | 0.000145  | <i>Ctrl</i>                                         | -5.69373  | 0.001429243 |
| <i>Igip</i>                                          | 2.471296  | 0.000256  | <i>Gm8000</i>                                       | -5.66916  | 0.001445218 |
| <i>Trio</i>                                          | 1.65572   | 0.00026   | <i>Acp2</i>                                         | -1.75448  | 0.001881934 |
| <i>Arhgef3</i>                                       | 1.033652  | 0.000338  | <i>Gm10509</i>                                      | -5.3901   | 0.002097053 |
| <i>Gm44937</i>                                       | 3.799383  | 0.000372  | <i>Cd226</i>                                        | -1.89377  | 0.002118614 |
| <i>Klra3</i>                                         | 4.05604   | 0.000385  | <i>Ptafr</i>                                        | -2.42438  | 0.002436268 |
| <i>Dclre1a</i>                                       | 2.138831  | 0.000454  | <i>Gm44745</i>                                      | -4.37293  | 0.002618644 |
| <i>Gm12474</i>                                       | 4.680125  | 0.000472  | <i>Mgat4a</i>                                       | -1.69174  | 0.002840022 |
| <i>Creml</i>                                         | 2.195776  | 0.000486  | <i>Bcl11b</i>                                       | -1.54578  | 0.002858117 |
| <i>Gm38304</i>                                       | 5.693536  | 0.000506  | <i>Acss2</i>                                        | -1.16265  | 0.003634139 |
| <i>Usp46</i>                                         | 1.656611  | 0.000541  | <i>Vezf1</i>                                        | -1.04997  | 0.004021531 |
| <i>Nlrp1b</i>                                        | 5.537333  | 0.00055   | <i>Trav15d-1-dv6d-1</i>                             | -6.06744  | 0.004101732 |
| <i>Wls</i>                                           | 1.250482  | 0.000674  | <i>Pdzd9</i>                                        | -5.42141  | 0.004181892 |
| <i>Mdfic</i>                                         | 1.145723  | 0.000728  | <i>Cdo1</i>                                         | -3.67976  | 0.005921496 |
| <i>Arap3</i>                                         | 1.213769  | 0.000821  | <i>Trav15d-2-dv6d-2</i>                             | -4.01615  | 0.006417876 |
| <i>Gm44175</i>                                       | 1.071119  | 0.000992  | <i>Trav15n-2</i>                                    | -4.01615  | 0.006417876 |
| <i>Gm37313</i>                                       | 5.728253  | 0.001166  | <i>Cxcr3</i>                                        | -1.01362  | 0.006417876 |
| <i>Gsap</i>                                          | 1.132776  | 0.001184  | <i>Gm11869</i>                                      | -5.30471  | 0.00755292  |
| <i>Gm47571</i>                                       | 2.698057  | 0.001462  | <i>AA914427</i>                                     | -5.07344  | 0.00855734  |
| <i>Gm4032</i>                                        | 2.935027  | 0.001462  | <i>Gm19331</i>                                      | -4.02333  | 0.009319369 |
| <i>Arhgef25</i>                                      | 2.190686  | 0.001809  | <i>Fbxl21</i>                                       | -3.59406  | 0.009494792 |
| <i>A930002l21Rik</i>                                 | 6.382722  | 0.001971  | <i>Gm43566</i>                                      | -5.2179   | 0.011211491 |
| <i>Ttc30a1</i>                                       | 6.701831  | 0.002094  | <i>Gbp11</i>                                        | -5.19167  | 0.011374094 |
| <i>Trav9d-3</i>                                      | 2.018748  | 0.002097  | <i>Hist1h4n</i>                                     | -4.66668  | 0.01169224  |
| <i>Trav9n-3</i>                                      | 2.018748  | 0.002097  | <i>Eepd1</i>                                        | -5.03142  | 0.011742266 |
| <i>Pde7b</i>                                         | 1.861599  | 0.002375  | <i>Fbxo8</i>                                        | -1.10453  | 0.011742266 |
| <i>Bend4</i>                                         | 2.325691  | 0.002433  | <i>Lncbate6</i>                                     | -1.84667  | 0.012738966 |
| <i>Tsga10</i>                                        | 1.196677  | 0.002619  | <i>Gm12713</i>                                      | -5.14117  | 0.013551604 |

|                      |          |          |                      |          |             |
|----------------------|----------|----------|----------------------|----------|-------------|
| <i>Cables1</i>       | 1.073842 | 0.002781 | <i>Klf3</i>          | -2.28268 | 0.013568717 |
| <i>Itih5</i>         | 1.691067 | 0.002781 | <i>Rgs4</i>          | -2.68301 | 0.014253307 |
| <i>Ckm</i>           | 1.563373 | 0.002835 | <i>Cox7a1</i>        | -2.99604 | 0.014653697 |
| <i>Nr4a1</i>         | 2.516035 | 0.003536 | <i>BE692007</i>      | -2.24481 | 0.015664207 |
| <i>Gm19557</i>       | 1.169353 | 0.003572 | <i>Gm48565</i>       | -4.69275 | 0.01658852  |
| <i>Kctd15</i>        | 4.331551 | 0.00382  | <i>Gm37352</i>       | -3.38135 | 0.016781735 |
| <i>Zmym6</i>         | 1.595695 | 0.004102 | <i>Cdkl4</i>         | -5.81185 | 0.020335977 |
| <i>Cd200</i>         | 2.313767 | 0.006078 | <i>Hist3h2ba</i>     | -2.16839 | 0.02065085  |
| <i>Ace2</i>          | 5.363982 | 0.006418 | <i>Deptor</i>        | -2.11977 | 0.021642335 |
| <i>Gm45716</i>       | 1.398436 | 0.006627 | <i>Mbtps2</i>        | -1.19896 | 0.022154154 |
| <i>Slc16a11</i>      | 2.017222 | 0.008392 | <i>Cd4</i>           | -1.9196  | 0.023487106 |
| <i>Gm10801</i>       | 1.056987 | 0.008683 | <i>A530041M06Rik</i> | -1.52878 | 0.024581149 |
| <i>Gm45640</i>       | 3.758381 | 0.009084 | <i>Gm49368</i>       | -1.62591 | 0.025536346 |
| <i>Cers6</i>         | 1.427203 | 0.009356 | <i>Gm42161</i>       | -3.40853 | 0.026337231 |
| <i>Naa16</i>         | 1.142078 | 0.011211 | <i>Gm10392</i>       | -1.77524 | 0.026872804 |
| <i>Zfx</i>           | 1.599695 | 0.011223 | <i>Gmeb2</i>         | -2.02454 | 0.030630494 |
| <i>4930431P03Rik</i> | 2.610789 | 0.011223 | <i>Emp3</i>          | -1.06952 | 0.030630494 |
| <i>Gm37124</i>       | 3.526872 | 0.011541 | <i>Inpp4b</i>        | -1.75433 | 0.031222696 |
| <i>A530083M17Rik</i> | 1.692958 | 0.011692 | <i>Gm28791</i>       | -1.02655 | 0.031222696 |
| <i>Pidd1</i>         | 2.467629 | 0.011742 | <i>Mirt1</i>         | -1.09175 | 0.031408479 |
| <i>Gm45235</i>       | 2.023999 | 0.012155 | <i>Ifit1b1</i>       | -1.10279 | 0.032532433 |
| <i>Gm17300</i>       | 1.782229 | 0.01246  | <i>Sit1</i>          | -3.39506 | 0.034254991 |
| <i>Asah2</i>         | 3.111448 | 0.012703 | <i>Uchl1os</i>       | -2.19954 | 0.034405101 |
| <i>Plek</i>          | 1.905637 | 0.013253 | <i>Zfp574</i>        | -1.55884 | 0.041200011 |
| <i>Gm43137</i>       | 5.171314 | 0.013253 | <i>Clec12a</i>       | -2.16814 | 0.042411778 |
| <i>Lag3</i>          | 1.051722 | 0.014253 | <i>Ifitm10</i>       | -1.27995 | 0.042678342 |
| <i>Cyth3</i>         | 1.065344 | 0.014253 | <i>1600012H06Rik</i> | -1.32861 | 0.042843538 |
| <i>Tspan4</i>        | 2.155092 | 0.014253 | <i>Muc1</i>          | -4.83637 | 0.04396801  |
| <i>Med14</i>         | 1.352428 | 0.014598 | <i>Trbj1-1</i>       | -1.7668  | 0.046394178 |
| <i>Trav16n</i>       | 2.107524 | 0.015334 | <i>Gm42780</i>       | -4.53285 | 0.048510052 |
| <i>Crim1</i>         | 2.693165 | 0.015334 | <i>B4galnt2</i>      | -1.38957 | 0.048510052 |
| <i>Zfp595</i>        | 1.562694 | 0.015742 | <i>Fam53b</i>        | -1.65382 | 0.048924305 |
| <i>Mettl9</i>        | 1.161021 | 0.016583 | <i>Trdc</i>          | -4.53865 | 1.26254E-46 |
| <i>Cdkn2b</i>        | 4.452195 | 0.016758 | <i>Cish</i>          | -1.27063 | 7.03338E-10 |
| <i>Pom121</i>        | 1.440646 | 0.017047 | <i>A130014A01Rik</i> | -4.93386 | 1.30022E-09 |
| <i>Gm29112</i>       | 3.285148 | 0.018774 | <i>Bbs10</i>         | -7.48837 | 2.01595E-09 |
| <i>Gm43413</i>       | 1.11705  | 0.018933 | <i>Plac8</i>         | -1.16391 | 3.38171E-08 |
| <i>Pabpc4</i>        | 1.906865 | 0.020651 | <i>Thy1</i>          | -2.31287 | 4.3433E-08  |
| <i>Egr1</i>          | 1.990024 | 0.020902 | <i>Syk</i>           | -6.91316 | 1.66875E-07 |
| <i>H60b</i>          | 1.952307 | 0.020941 | <i>Lat</i>           | -1.18016 | 1.93934E-07 |
| <i>Klrb1</i>         | 1.701475 | 0.023204 | <i>Krt18</i>         | -8.56492 | 3.91255E-07 |
| <i>Filip1</i>        | 6.355295 | 0.023276 | <i>Scin</i>          | -1.94765 | 9.48968E-07 |
| <i>Kit</i>           | 1.196299 | 0.023361 | <i>Gm47322</i>       | -6.45336 | 2.60109E-06 |
| <i>Gm11168</i>       | 1.025009 | 0.023487 | <i>Kbtbd13</i>       | -6.45716 | 2.99673E-06 |
| <i>6030400A10Rik</i> | 5.006698 | 0.023729 | <i>5031439G07Rik</i> | -4.1797  | 3.08547E-06 |
| <i>Pcdhb7</i>        | 4.754488 | 0.025397 | <i>Cd63</i>          | -3.00503 | 3.08547E-06 |
| <i>Ints14</i>        | 1.582965 | 0.02603  | <i>Gm42872</i>       | -5.24863 | 5.84823E-06 |
| <i>Ilgav</i>         | 1.039502 | 0.02789  | <i>Gm39091</i>       | -6.42539 | 1.77748E-05 |
| <i>Ccdc102a</i>      | 1.119039 | 0.029585 | <i>Thns12</i>        | -4.97354 | 3.23055E-05 |
| <i>Usp38</i>         | 1.29133  | 0.029926 | <i>B9d1</i>          | -6.32686 | 3.26977E-05 |
| <i>Pheta2</i>        | 1.103337 | 0.030221 | <i>Cdc14b</i>        | -3.06993 | 3.67793E-05 |
| <i>Cd40lg</i>        | 4.582232 | 0.032083 | <i>Gzmk</i>          | -1.00806 | 8.87897E-05 |
| <i>Gm33104</i>       | 1.142824 | 0.033322 | <i>Susd2</i>         | -5.59168 | 0.000233757 |
| <i>Klra1</i>         | 1.382559 | 0.033322 | <i>Gm26353</i>       | -6.01318 | 0.000274643 |
| <i>Hpf1</i>          | 1.157305 | 0.034255 | <i>Pdzk1</i>         | -7.3396  | 0.000320842 |
| <i>Spred1</i>        | 2.414797 | 0.034741 | <i>Rnf146</i>        | -1.10054 | 0.000595956 |
| <i>Gm3650</i>        | 3.878987 | 0.035173 | <i>Tpcn1</i>         | -2.57531 | 0.000658268 |
| <i>Fam92a</i>        | 1.220107 | 0.037203 | <i>Gm30934</i>       | -5.83734 | 0.000711777 |
| <i>Kbtbd7</i>        | 1.920862 | 0.037684 | <i>Ifi208</i>        | -1.46736 | 0.000723897 |
| <i>Naprt</i>         | 1.655793 | 0.0412   | <i>Zscan30</i>       | -5.80015 | 0.000810335 |
| <i>Gm44037</i>       | 2.876672 | 0.041263 | <i>Atp8a2</i>        | -1.8044  | 0.001098701 |
| <i>Gm45894</i>       | 3.898248 | 0.041696 | <i>Osm</i>           | -6.16468 | 0.001165619 |
| <i>Adh1</i>          | 1.836137 | 0.041785 | <i>Gm45378</i>       | -5.7467  | 0.001165619 |
| <i>Dclk2</i>         | 2.886998 | 0.043968 | <i>Fhbp1l</i>        | -3.07833 | 0.001165619 |
| <i>Zfp65</i>         | 1.799708 | 0.044198 | <i>Gm45867</i>       | -2.1641  | 0.001168729 |
| <i>Gm20707</i>       | 1.776769 | 0.044671 | <i>Galnt10</i>       | -2.4545  | 0.001353819 |
| <i>Gm10717</i>       | 1.016993 | 0.044708 | <i>Cd6</i>           | -3.89704 | 0.001390277 |
| <i>Crybg1</i>        | 1.237992 | 0.044708 | <i>E430021H15Rik</i> | -1.39668 | 0.001390277 |
| <i>Tmem186</i>       | 1.184771 | 0.046619 | <i>Ctrl</i>          | -5.69373 | 0.001429243 |
| <i>1700037H04Rik</i> | 1.390203 | 0.046891 | <i>Gm8000</i>        | -5.66916 | 0.001445218 |

|                |          |          |             |          |             |
|----------------|----------|----------|-------------|----------|-------------|
| <i>St1</i>     | 1.267517 | 0.047474 | <i>Acp2</i> | -1.75448 | 0.001881934 |
| <i>Tssk6</i>   | 3.311044 | 0.047474 |             |          |             |
| <i>Zfp850</i>  | 2.04788  | 0.04851  |             |          |             |
| <i>Edem3</i>   | 1.512383 | 0.049055 |             |          |             |
| <i>Gm10720</i> | 1.092274 | 0.049493 |             |          |             |
| <i>Slc35f5</i> | 1.934453 | 0.049793 |             |          |             |

List of significantly expressed genes relatively overexpressed in  $E8_i^{WT(Trac)} CD4^-CD8\beta^-CD8\alpha\alpha^+$  intraepithelial lymphocytes (nIELs; left) or in  $E8_i^{\Delta(Trac)}$  nIELs (right) as assessed by the wald-test. Average log fold change of expression (ave\_logFC) and adjusted p value (p\_val\_adj) as indicated. N=3 per genotype,  $p_{sig} < 0.05$ . See also Figure 5.



## Supplementary Figures and Legends

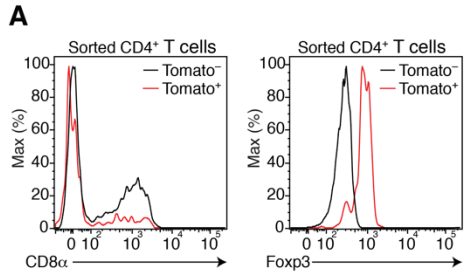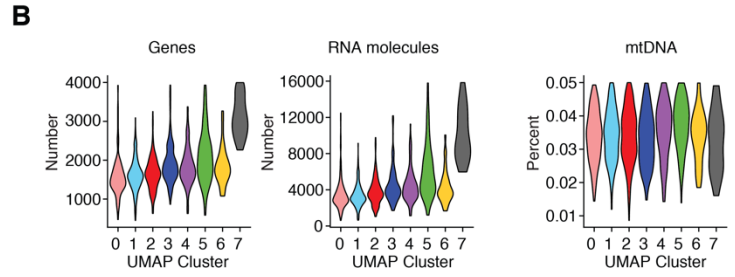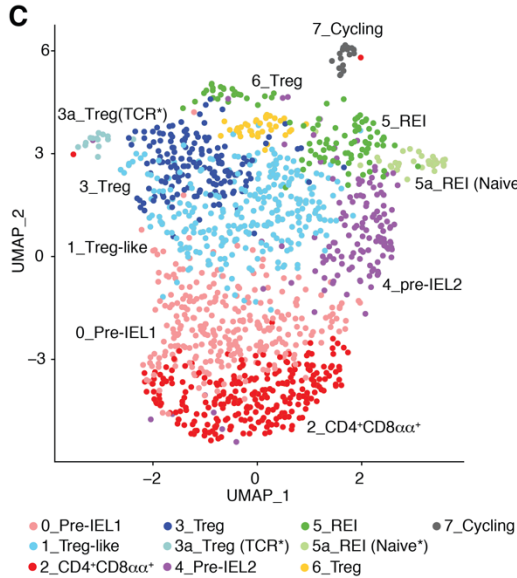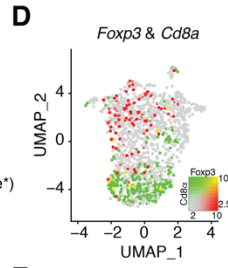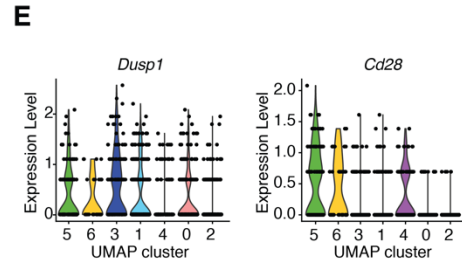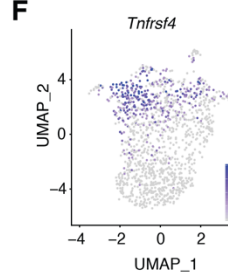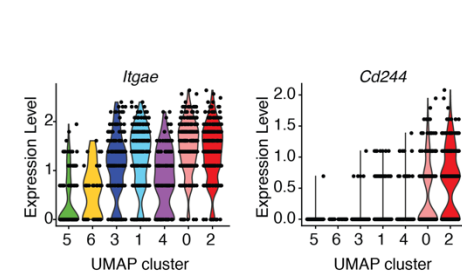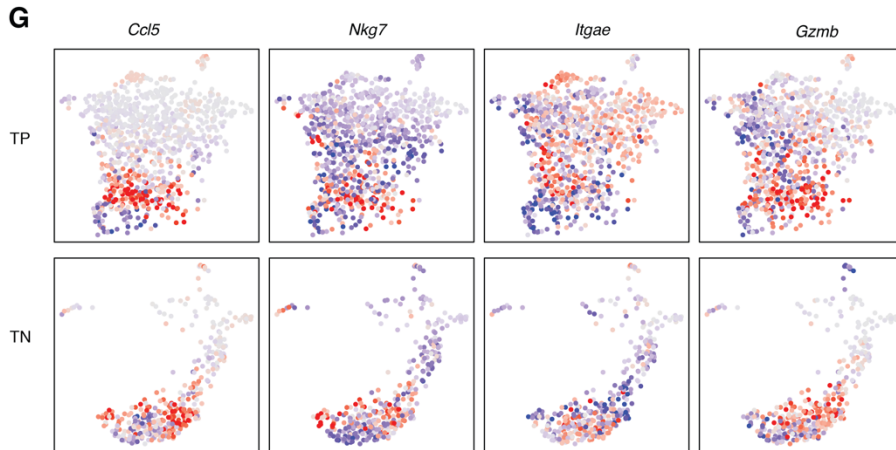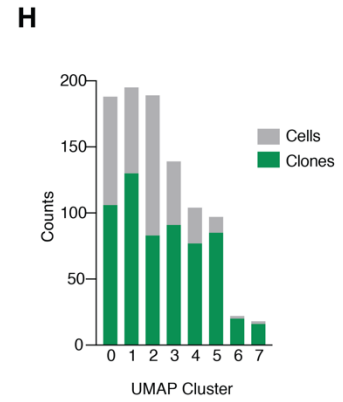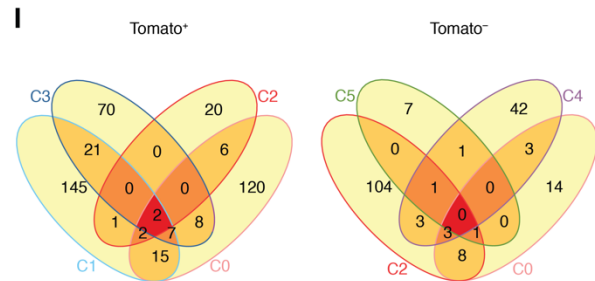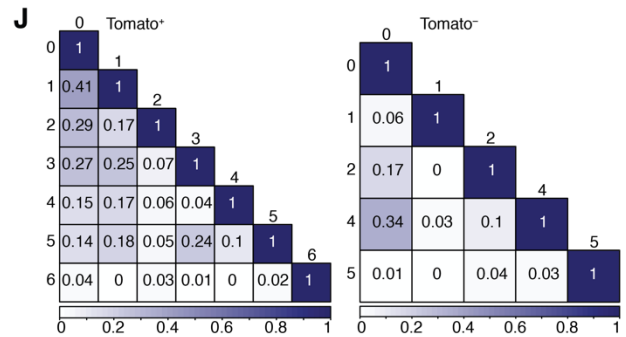

**Figure S1 (related to Figure 1; Clonal distribution of intraepithelial CD4<sup>+</sup> T cells follows the single-cell trajectories).** (A-J) A iFoxp3<sup>Tom</sup> mouse was treated with tamoxifen for 10 weeks, and Tomato<sup>+</sup> (library 1) and Tomato<sup>-</sup> (library 2) CD4<sup>+</sup> T cells from the intestinal epithelium (IE) were sorted for scRNAseq using 10X Genomics platform. (A) Surface CD8 $\alpha$  (left) and intranuclear Foxp3 (right) expression of sequenced CD4<sup>+</sup> Tomato<sup>+</sup> (red) and Tomato<sup>-</sup> (black) cells. (B) Number of sequenced genes (left) and RNA molecules (middle) per cluster and percent of mitochondrial DNA (right) per UMAP cluster. (C) UMAP clustering of 8 (0-7) distinct populations of single cells, including sub-clusters (3a, 5a). Sub-cluster 3a\_Treg (TCR\*) indicates Treg cells expressing TCR-stimulated genes. Sub-clusters 5a\_REI-Treg (Naïve\*) indicates *Sell*-expressing Treg cells. Cluster names correspond to cell colors throughout the figure as indicated. (D) Expression of *Foxp3* (red), *Cd8a* (green), or both (yellow) by all analyzed cells. (E) Expression of genes related to TCR signaling (top) or IEL program (bottom) in each UMAP cluster ordered by pseudotime trajectories. (F) Expression of *Tnfrsf4* (encoding Ox40) by analyzed cells. (G) UMAP projection color-coded by the residual expression of the indicated genes; red indicating levels of unspliced (upregulation) and blue indicating higher levels of spliced (downregulation) RNA molecules of each gene. (H) Total number of cells with paired  $\alpha\beta$ TCR sequences (grey) and total number of clones (green) within each UMAP cluster. (I) Venn diagram showing number of clones overlapping between indicated scRNAseq clusters. (J) Normalized Morisita-Horn index of paired  $\alpha\beta$ TCR per UMAP cluster among Tomato<sup>+</sup> (left) and Tomato<sup>-</sup> (right) cells. N=1 mouse, 1,294 sequenced cells.

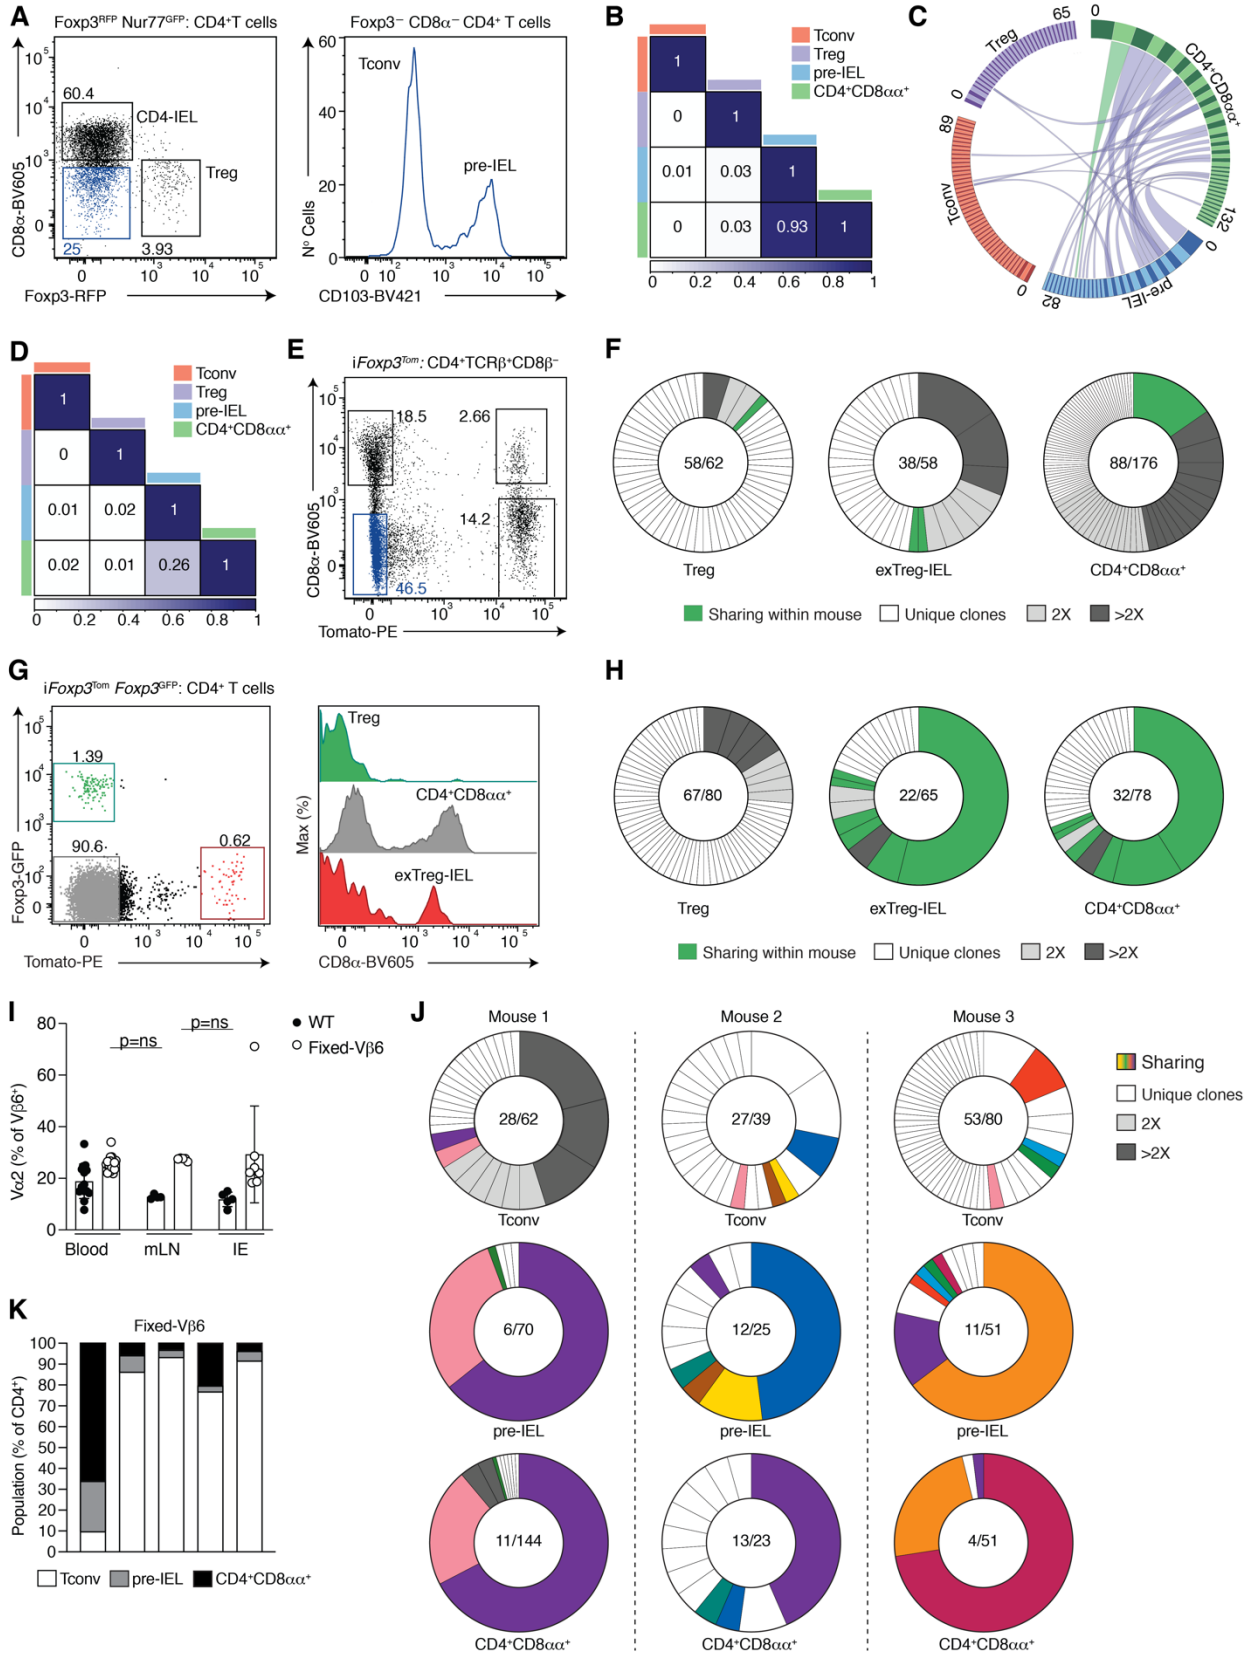

**Figure S2 (related to Figure 2; CD4<sup>+</sup>CD8 $\alpha$  $\alpha$ <sup>+</sup> IELs are clonally expanded with decreased TCR diversity).** (A-C) CD4<sup>+</sup> T cells from the intestinal epithelium (IE) of two *Foxp3*<sup>RFP</sup>*Nur77*<sup>GFP</sup> mice were sorted as follows: CD4<sup>+</sup> conventional (Tconv; RFP<sup>-</sup>CD103<sup>-</sup>CD8 $\alpha$ <sup>-</sup>), regulatory T cells (Treg; RFP<sup>+</sup>), pre-IEL (RFP<sup>-</sup>CD103<sup>+</sup>CD8 $\alpha$ <sup>-</sup>) and CD4<sup>+</sup>CD8 $\alpha$  $\alpha$ <sup>+</sup> IEL (RFP<sup>-</sup>CD103<sup>+</sup>CD8 $\alpha$ <sup>+</sup>). TCR $\beta$  and TCR $\alpha$  were sequenced via the MiSeq platform. (A) Dot plot of sorted cells as indicated. Blue histogram (right) of Foxp3<sup>-</sup>CD8 $\alpha$ <sup>-</sup> cells (blue in right graph). (B) Normalized Morisita-Horn index of paired  $\alpha\beta$ TCR per population of mouse 1 of 2 sequenced mice. (C) Circos plot shows the distribution of paired  $\alpha\beta$ TCR CDR3 sequences, with clones ordered clockwise from largest to smallest. Links indicate clonal sharing between populations within the mouse; purple links indicate clonal expansions lower than 10 cells, green links 10 or more cells. (D) Normalized Morisita-Horn index of paired  $\alpha\beta$ TCR per population of 2 of 2 sequenced mice. (E-F) CD4<sup>+</sup> T cells from the IE of *Foxp3*<sup>eGFP-cre-ERT2</sup>  $\times$  *Rosa26*<sup>lsI-tdTomato</sup> (*iFoxp3*<sup>Tom</sup>) mice following 10 weeks of tamoxifen treatment were sorted as follows: CD4<sup>+</sup> conventional (Tconv; Tomato<sup>-</sup>CD103<sup>-</sup>CD8 $\alpha$ <sup>-</sup>), regulatory T cells mixed with Treg cell-derived pre-IELs (Treg cells and pre-IEL; Tomato<sup>+</sup>CD8 $\alpha$ <sup>-</sup>), Tconv-derived pre-IELs (pre-IEL; Tomato<sup>-</sup>CD103<sup>+</sup>CD8 $\alpha$ <sup>-</sup>), Treg cell-derived CD4<sup>+</sup>CD8 $\alpha$  $\alpha$ <sup>+</sup> IELs (exTreg-IEL; Tomato<sup>+</sup>CD103<sup>+</sup>CD8 $\alpha$ <sup>+</sup>) and Tconv derived CD4<sup>+</sup>CD8 $\alpha$  $\alpha$ <sup>+</sup> IELs (CD4<sup>+</sup>CD8 $\alpha$  $\alpha$ <sup>+</sup>; Tomato<sup>-</sup>CD103<sup>+</sup>CD8 $\alpha$ <sup>+</sup>). TCR $\beta$  and TCR $\alpha$  were sequenced via the MiSeq platform. (E) Dot plot depicting CD8 $\alpha$  and Tomato expression by IE CD4<sup>+</sup> T cells. Blue cells indicate population from which pre-IELs were derived, as in (A). (F)  $\alpha\beta$ TCR clonal diversity of indicated populations of mouse 2 of 2 sequenced mice. Each slice represents a distinct  $\alpha\beta$ TCR CDR3. Green clones represent sharing within each mouse. White slices represent unique clones and grey-scale slices represent expanded clones at indicated populations. The numbers enclosed in each graph indicate number of clones (numerator) and total number of cells (denominator) sequenced per indicated population. (G-H) CD4<sup>+</sup> T cells from the IE of *Foxp3*<sup>eGFP-cre-ERT2</sup>  $\times$  *Rosa26*<sup>lsI-tdTomato</sup>  $\times$  *Foxp3*<sup>lRES-GFP</sup> (*iFoxp3*<sup>Tom</sup> *Foxp3*<sup>GFP</sup>) mice after a 10 week tamoxifen treatment were sorted as follows: regulatory T cells (Treg; GFP<sup>+</sup>Tomato<sup>-</sup>CD8 $\alpha$ <sup>-</sup>), Treg cell-derived CD4<sup>+</sup>CD8 $\alpha$  $\alpha$ <sup>+</sup> IELs (exTreg-IEL; Tomato<sup>+</sup>CD8 $\alpha$ <sup>+</sup>) and Tconv cell derived CD4<sup>+</sup>CD8 $\alpha$  $\alpha$ <sup>+</sup> IELs (CD4<sup>+</sup>CD8 $\alpha$  $\alpha$ <sup>+</sup>; Tomato<sup>-</sup>CD8 $\alpha$ <sup>+</sup>). TCR $\beta$  (and TCR $\alpha$  of expanded TCR $\beta$  clones) were sequenced via the MiSeq platform. (G) Dot plot of GFP<sup>+</sup> (green), Tomato<sup>+</sup> (red) and double-negative (grey) CD4<sup>+</sup> T cells in the IE (left) and their corresponding CD8 $\alpha$  expression (histogram, right) with sorted populations as indicated. (H)  $\alpha\beta$ TCR clonal diversity of indicated populations of mouse 1 of 2 sequenced mice. Label scheme as in (F). (I-K) Total V $\alpha$ 2<sup>+</sup> V $\beta$ 6<sup>+</sup> CD4<sup>+</sup> T cells from three fixed-V $\beta$ 6  $\times$  *Foxp3*<sup>GFP</sup> mice were single-cell sorted as follows: Tconv cell

(CD103<sup>-</sup>CD8 $\alpha$ <sup>-</sup>), pre-IEL (CD103<sup>+</sup>CD8 $\alpha$ <sup>-</sup>) and CD4<sup>+</sup>CD8 $\alpha$  $\alpha$ <sup>+</sup> IEL (CD103<sup>+</sup>CD8 $\alpha$ <sup>-</sup>). TCR $\alpha$  were sequenced via the MiSeq platform. **(I)** TCR V $\alpha$ 2 frequencies among TCR V $\beta$ 6 CD4<sup>+</sup> T cells in blood, mesenteric lymph nodes (mLN) and intestinal epithelium (IE) of WT and fixed-V $\beta$ 6 mice. **(J)** Clonal diversity of indicated populations of three sequenced mice. Each slice represents a distinct TCR $\alpha$  CDR3. Colored clones represent sharing between populations and mice; pink clone is the same as the transnuclear (TN) monoclonal strain, purple is 1 amino acid different from the TN clone. White slices represent unique clones and grey-scale slices represent expanded clones at indicated numbers. **(K)** Relative frequencies of indicated IE populations among CD4<sup>+</sup> T cells, each bar represents 1 mouse.

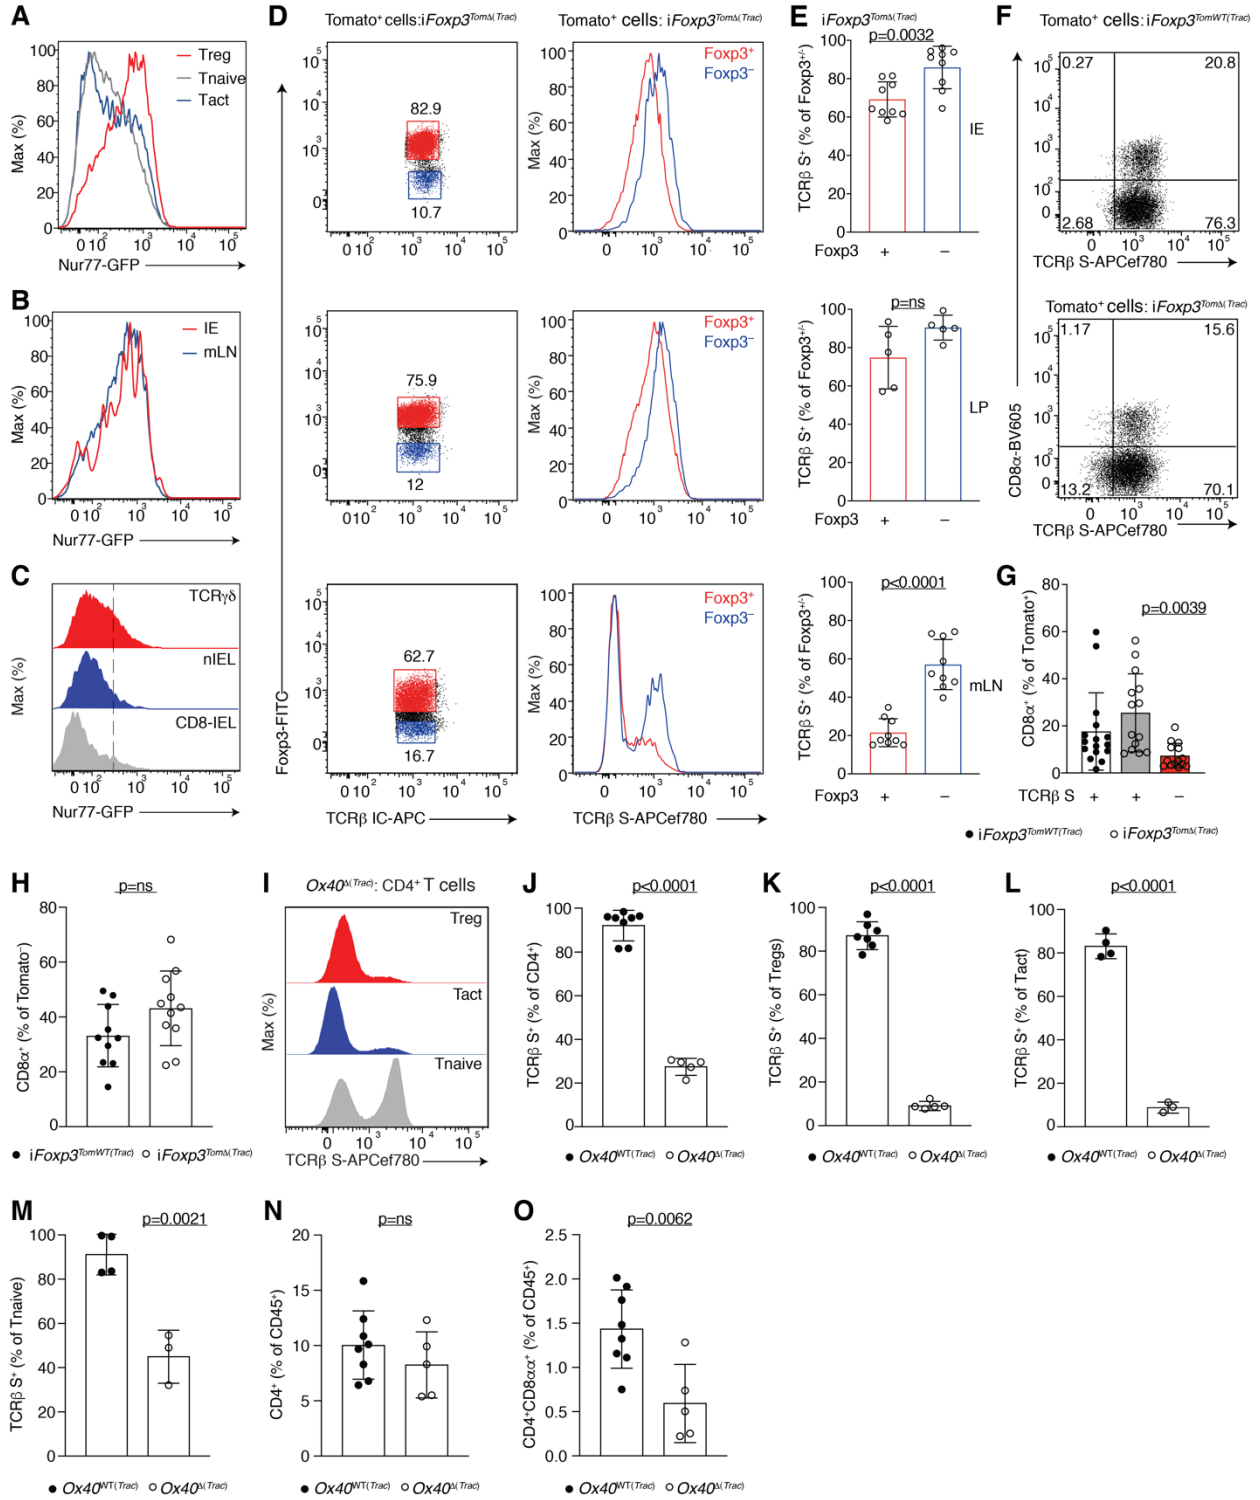

**Figure S3 (related to Figure 3; TCR signaling is required for CD4<sup>+</sup>CD8 $\alpha$  $\alpha$ <sup>+</sup> IEL differentiation).**

(A-C) *Nur77*-GFP expression by indicated cell types from *Nur77*<sup>GFP</sup> *Foxp3*<sup>RFP</sup> double-reporter mice. (A) *Nur77*<sup>GFP</sup> expression among CD4<sup>+</sup> *Foxp3*<sup>+</sup> regulatory T cells (Treg, red), CD62L<sup>high</sup>CD44<sup>low</sup> naïve T cells (Tnaïve, grey), and CD62L<sup>low</sup>CD44<sup>high</sup> *Foxp3*<sup>-</sup> activated T cells (Tact, blue) in the mesenteric lymph nodes (mLN). (B) *Nur77*<sup>GFP</sup> expression among *Foxp3*<sup>+</sup> Treg cells in the intestinal epithelium (IE, red) and mLN (blue). (C) *Nur77*<sup>GFP</sup> expression among TCR $\gamma\delta$ -IELs (red), CD8 $\alpha$  $\alpha$ <sup>+</sup>CD8 $\beta$ <sup>-</sup>CD4<sup>-</sup>TCR $\alpha\beta$ <sup>+</sup> natural IELs (nIEL, blue) and CD8 $\alpha$  $\alpha$ <sup>+</sup>CD8 $\beta$ <sup>+</sup>TCR $\alpha\beta$ <sup>+</sup> IELs (CD8 $\alpha\beta$ <sup>+</sup>CD8 $\alpha\alpha$ <sup>+</sup>, grey) in the small intestine epithelium. (D-H) Flow cytometry analysis of iFoxp3<sup>TomWT(Trac)</sup> (*Trac*<sup>+/+</sup> iFoxp3<sup>Tom</sup>) or iFoxp3<sup>TomΔ(Trac)</sup> (*Trac*<sup>ff</sup> iFoxp3<sup>Tom</sup>) mice 8-12 weeks after tamoxifen administration. (D) Dot plots (left) for intracellular TCR $\beta$  and *Foxp3*, or histograms (right) of surface TCR $\beta$  expression among tomato<sup>+</sup> *Foxp3*<sup>+</sup> Treg cells (red) and tomato<sup>+</sup> *Foxp3*<sup>-</sup> CD4<sup>+</sup> T cells (blue) in the intestinal epithelium (IE, top), lamina propria (LP, middle) and mesenteric lymph nodes (mLN, bottom). (E) Frequencies of surface TCR $\beta$ -expressing cells among *Foxp3*<sup>+</sup> or *Foxp3*<sup>-</sup> among tomato<sup>+</sup> CD4<sup>+</sup> T cells from iFoxp3<sup>TomΔ(Trac)</sup> IE (top), LP (middle) or mLN (bottom). (F) Dot plots of surface CD8 $\alpha$  and TCR $\beta$  of Tomato<sup>+</sup> CD4<sup>+</sup> T cells in iFoxp3<sup>TomWT(Trac)</sup> (top) and iFoxp3<sup>TomΔ(Trac)</sup> (bottom) mice. (F) Frequencies of CD8 $\alpha$ <sup>+</sup> cells among Tomato<sup>+</sup> CD4<sup>+</sup> T cells within TCR-sufficient cells from iFoxp3<sup>TomWT(Trac)</sup> (white bar) or iFoxp3<sup>TomΔ(Trac)</sup> (grey bar) mice, or TCR-deficient cells from iFoxp3<sup>TomΔ(Trac)</sup> (red bar) mice. (H) Frequency of CD8 $\alpha$ -expressing CD4<sup>+</sup> (CD4<sup>+</sup>CD8 $\alpha\alpha$ <sup>+</sup> IELs) cells among tomato<sup>-</sup> cells in the IE of iFoxp3<sup>TomWT(Trac)</sup> or iFoxp3<sup>TomΔ(Trac)</sup> mice. (I-O) Flow cytometry analysis of cells isolated from the IE and mLN of 9-12 week-old *Ox40*<sup>WT(Trac)</sup> (*Trac*<sup>+/+</sup> *Ox40*<sup>cre+/-</sup> or *Trac*<sup>ff</sup> *Ox40*<sup>cre-/-</sup>) or *Ox40*<sup>Δ(Trac)</sup> (*Trac*<sup>ff</sup> *Ox40*<sup>cre+/-</sup>) mice. (I) Histogram of surface TCR $\beta$  expression among Treg cells (red), Tact cells (blue) and Tnaïve cells (grey) CD4<sup>+</sup> T cells in the mLN. (J-M) Frequencies of surface TCR $\beta$ -expressing cells among CD4<sup>+</sup> T cells (J), Tregs (K), CD4<sup>+</sup> activated cells (Tact, *Foxp3*<sup>-</sup>CD44<sup>high</sup>CD62L<sup>low</sup>) (L) and CD4<sup>+</sup> naïve cells (Tnaïve, *Foxp3*<sup>-</sup>CD44<sup>low</sup>CD62L<sup>high</sup>) (M) cells in the mLN. (N, O) Frequencies of total CD4<sup>+</sup> T cells (N) and CD4<sup>+</sup>CD8 $\alpha\alpha$ <sup>+</sup>IELs (CD8 $\alpha$ <sup>+</sup>TL-Tetramer<sup>+</sup>) (O) among total CD45<sup>+</sup> cells in the IE. Data are expressed as mean +/- SEM of individual mice (n=5-16, 2-6 experiments). Significant p values as indicated [student's t test (E,H-L, N,O) or one-way ANOVA and Bonferroni (G)].



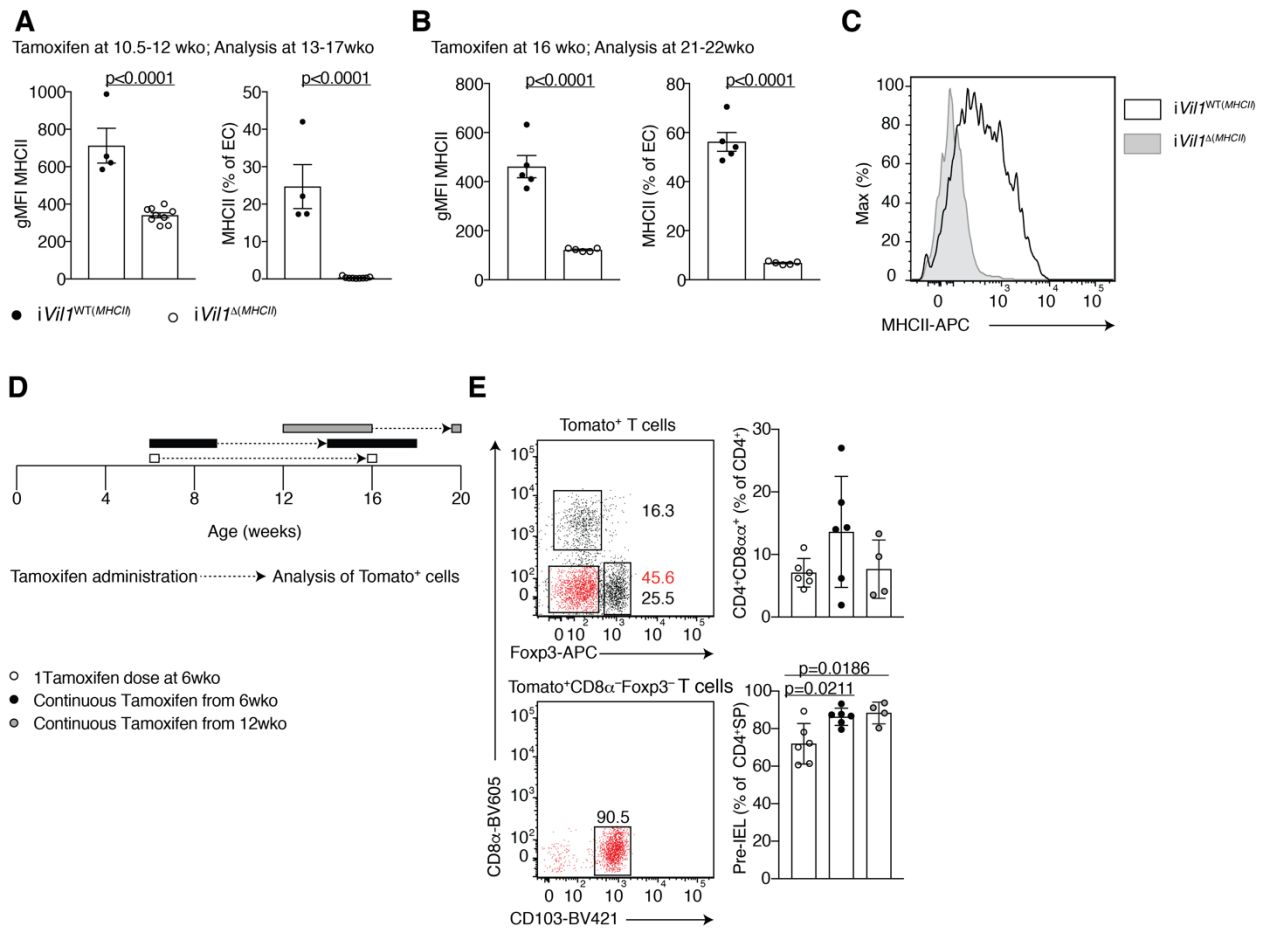

**Figure S4 (related to Figure 4; MHCII expression by epithelial cells is required for CD4<sup>+</sup>CD8α<sup>+</sup> IEL differentiation).** (A-C) Flow cytometry analysis of the intestinal epithelium (IE) of *iVil1<sup>WT(MHCII)</sup>* (*H2-Ab1<sup>+/+</sup> Vil1<sup>creERT2+/-</sup>* or *H2-Ab1<sup>fl/fl</sup> Vil1<sup>creERT2-/-</sup>*) or *iVil1<sup>Δ(MHCII)</sup>* (*H2-Ab1<sup>fl/fl</sup> Vil1<sup>creERT2+/+</sup>*) mice after tamoxifen administration to 5-7 week-old mice, analyzed at 10-12.5 weeks (A) and to 16 week-old mice, analyzed at 21-22 weeks of age (B, C). (A, B) Geometric mean fluorescence intensity (gMFI) (left) and frequency (right) of MHCII expression by epithelial cells 3-5 weeks after tamoxifen administration. (C) Histogram of MHCII expression by EpCAM<sup>+</sup> epithelial cells in 21 week-old *iVil1<sup>WT(MHCII)</sup>* (white) or *iVil1<sup>Δ(MHCII)</sup>* (grey) mice 4 weeks after tamoxifen administration. (D, E) *iFoxp3<sup>Tomato</sup>* mice were treated with either 1 dose or continuous doses of Tamoxifen, and Tomato<sup>+</sup> CD4<sup>+</sup> T cells were analyzed from the intestinal epithelium. (D) Experimental layout of tamoxifen administration connected to analysis by dashed line. (E) Dot plots of surface CD8α expression and intracellular Foxp3 expression among Tomato<sup>+</sup> cells (top left) and surface CD103 expression among CD4<sup>+</sup>SP (Tomato<sup>+</sup>CD4<sup>+</sup>CD8α<sup>-</sup>) cells (bottom left). Graphs represent CD4<sup>+</sup>CD8α<sup>+</sup> IEL frequencies among Tomato<sup>+</sup> CD4<sup>+</sup> T cells (top right) and

pre-IELs frequencies among Tomato<sup>+</sup> CD4<sup>+</sup>SP cells (bottom right) of indicated tamoxifen administration schemes. Data are expressed as mean +/- SEM of individual mice (n=4-9). Significant p values as indicated [student's t test (**A**, **B**) or one-way ANOVA and Bonferroni (**E**)].

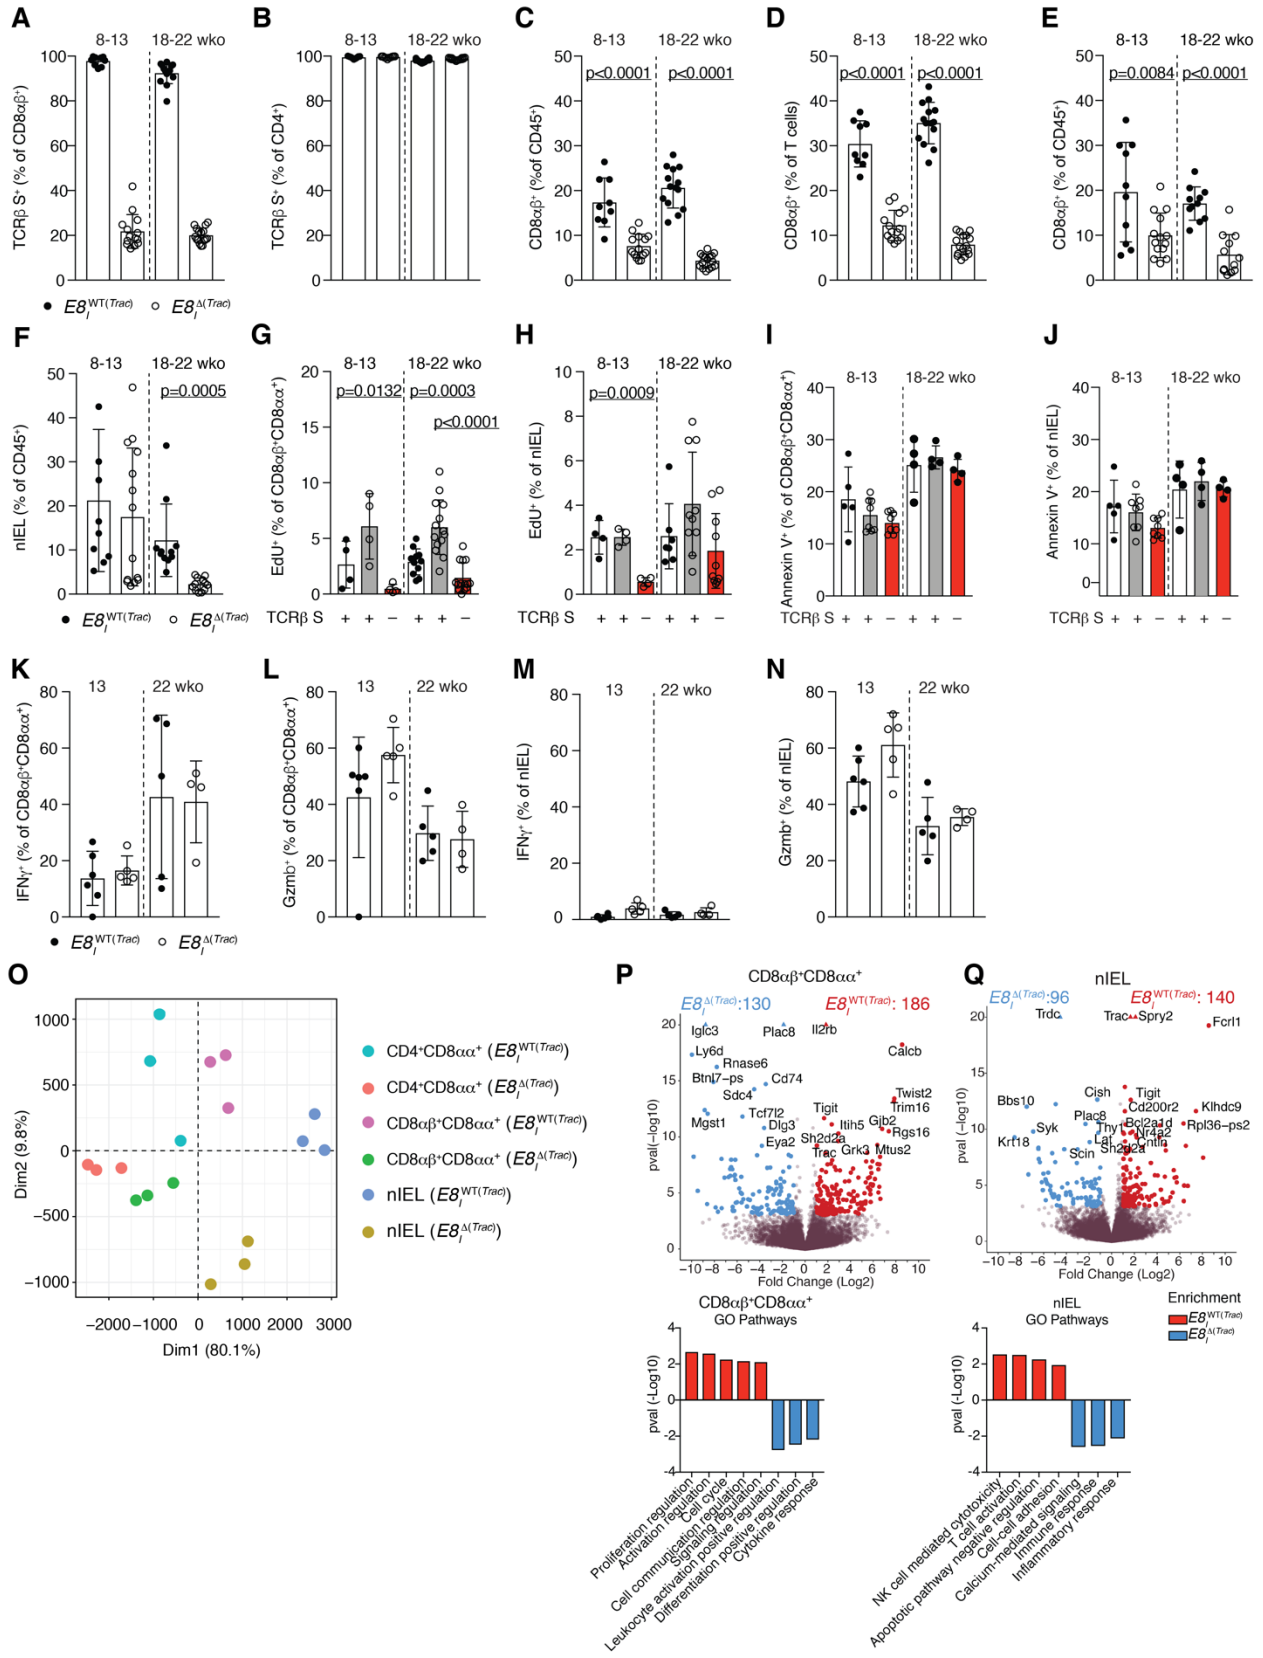

**Figure S5 (related to Figure 5; TCR signaling is not essential for CD4<sup>+</sup>CD8 $\alpha\alpha$ <sup>+</sup>IEL maintenance).**

**(A-N)** Flow cytometry analysis of 8-22 week-old E8<sub>I</sub><sup>WT(Trac)</sup> (*Trac*<sup>+/+</sup> E8<sub>I</sub><sup>cre+</sup> or *Trac*<sup>+/+</sup> E8<sub>I</sub><sup>cre-</sup> or *Trac*<sup>ff</sup> E8<sub>I</sub><sup>cre-</sup>) or E8<sub>I</sub> <sup>$\Delta$ (Trac)</sup> (*Trac*<sup>ff</sup> E8<sub>I</sub><sup>cre+</sup>) mice, grouped by age as indicated. Frequencies of surface TCR $\beta$ -expressing cells among CD8 $\alpha\beta$ <sup>+</sup> **(A)** and CD4<sup>+</sup> **(B)** T cells in the mesenteric lymph nodes (mLN). Frequency of CD8 $\alpha\beta$ <sup>+</sup> T cells among total CD45<sup>+</sup> cells **(C)** and intracellular TCR $\beta$ -expressing T cells **(D)** in the mLN. Frequencies of CD8 $\alpha\beta$ <sup>+</sup> T cells **(E)** and natural IELs (nIEL, CD4<sup>-</sup>CD8 $\alpha\alpha$ <sup>+</sup>CD8 $\beta$ <sup>-</sup>TL-Tetramer<sup>+</sup>) **(F)** among CD45<sup>+</sup> cells in the intestinal epithelium (IE). **(G, H)** Proliferation (EdU incorporation) of CD8 $\alpha\beta$ <sup>+</sup>CD8 $\alpha\alpha$ <sup>+</sup> IELs **(G)** or nIELs **(H)** with or without surface TCR $\beta$  expression after EdU injection 16 and 4 hours prior to analysis. **(I, J)** Frequencies of Annexin V<sup>+</sup> cells among CD8 $\alpha\beta$ <sup>+</sup>CD8 $\alpha\alpha$ <sup>+</sup> IELs **(I)** and nIELs **(J)**. **(K-N)** Frequencies of IFN $\gamma$  **(K, M)** and Gzmb **(L, N)** production upon PMA and ionomycin *ex-vivo* stimulation among CD8 $\alpha\beta$ <sup>+</sup>CD8 $\alpha\alpha$ <sup>+</sup> IELs **(K, L)** and nIELs **(M, N)**. **(O-Q)** Bulk RNA-sequencing was performed on TCR<sup>+</sup> CD4<sup>+</sup>CD8 $\alpha\alpha$ <sup>+</sup> IELs, CD8 $\alpha\beta$ <sup>+</sup>CD8 $\alpha\alpha$ <sup>+</sup> IELs and nIELs from E8<sub>I</sub><sup>WT(Trac)</sup> and TCR<sup>-</sup> CD4<sup>+</sup>CD8 $\alpha\alpha$ <sup>+</sup> IELs from E8<sub>I</sub> <sup>$\Delta$ (Trac)</sup> mice. **(O)** Principal component analysis of indicated cell populations. **(P,Q)** Volcano plots of differentially expressed genes between indicated populations ( $p < 0.05$ , in color) (top), and selected differentially-enriched gene ontology (GO) pathways between them (bottom). Data are expressed as mean  $\pm$  SEM of individual mice. (n=4-14). Significant p values as indicated [student's t test **(A-F, K-N)** or one-way ANOVA and Bonferroni **(G-J)**]. N=10-16 **(A-F)**, n=4-14 **(G, H)**, n=5-8 **(I, J)** and n=4-6 **(K-N)**. Sequencing data is n=3 mice per group **(O-Q)**.

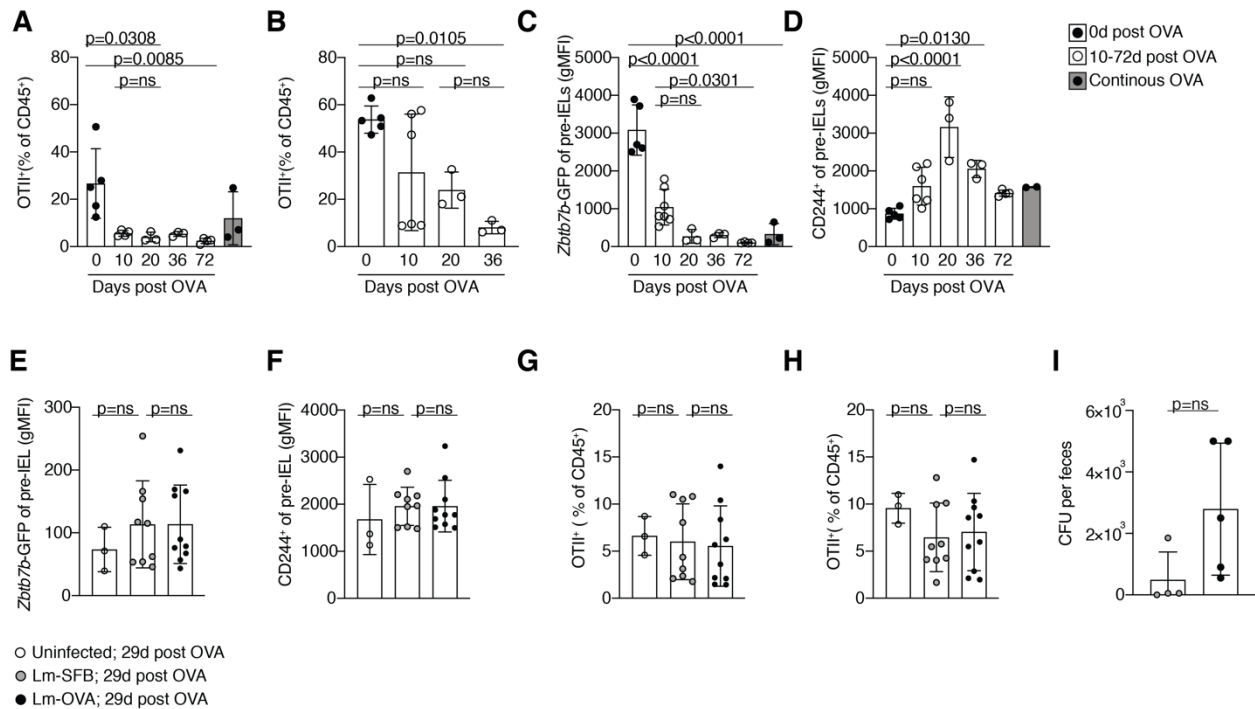

**Figure S6 (related to Figure 6; Cognate ligand interaction is dispensable for the maintenance of CD4<sup>+</sup>CD8 $\alpha$ <sup>+</sup>IELs under steady state or after *Listeria monocytogenes* infection).** (A-D) Total splenocytes and lymph node cells from OTII *Zbtb7b*<sup>GFP</sup> *Rag1*<sup>-/-</sup> mice were transferred to *Rag1*<sup>-/-</sup> animals 1 day prior to a 10-day ovalbumin (OVA) diet treatment. Transferred cells were analyzed at different time points after OVA withdrawal as indicated. (A) Frequencies of OTII CD4<sup>+</sup> T cells (V $\alpha$ 2<sup>+</sup>) among total CD45<sup>+</sup> cells in the epithelium (left) and mesenteric lymph nodes (right). (B, D) geometric mean fluorescence intensity (gMFI) of *Zbtb7b*-GFP (B) or CD244 (2B4) (D) expression among pre-IELs. (E-J) *Rag1*<sup>-/-</sup> animals were treated as in (A) and 20 days after OVA removal, animals were orally infected with *Listeria monocytogenes* expressing full length SFB protein 3340 or OVA (Lm-SFB or Lm-OVA, respectively) or were left uninfected. All mice were treated with streptomycin 24h prior to infection. Transferred cells were analyzed 9 days after infection. (E, F) gMFI of *Zbtb7b*-GFP (E) or CD244 (F) expression among pre-IELs. (G, H) Frequencies of OTII CD4<sup>+</sup> T cells among total CD45<sup>+</sup> cells in the epithelium (G) and mesenteric lymph nodes (H). (I) Colony forming units (CFU) per fecal pellet 3 days post infection. (n=3-9 of two independent experiments). Significant p values as indicated [student's t test (I) or one-way ANOVA and Bonferroni (A-H)].
